# Supplementary material for: Helically chiral multiresonant thermally activated delayed fluorescent emitters and their use in hyperfluorescent organic light-emitting diodes
Source: Royal Society of Chemistry journal article supplement (doi:10.1039/d4sc03478c), 2024-01-01
Supplement: d4sc03478c2.pdf [file d4sc03478c2.pdf]

**Helically chiral multiresonant thermally activated delayed fluorescent emitters  
and their use in hyperfluorescent organic light-emitting diodes**

*Jingxiang Wang<sup>a,‡</sup>, Dongyang Chen<sup>a,b,c,‡</sup>, Juan Manuel Moreno-Naranjo<sup>d</sup>, Francesco Zinna<sup>e</sup>, Lucas Frédéric<sup>f</sup>, David B. Cordes<sup>a</sup>, Aidan P. McKay<sup>a</sup>, Matthew J. Fuchter<sup>d\*</sup>, Xiaohong Zhang<sup>b,c\*</sup> and Eli Zysman-Colman<sup>a\*</sup>*

<sup>a</sup> Organic Semiconductor Centre, EaStCHEM School of Chemistry, University of St Andrews, St Andrews, Fife, UK, KY16 9ST, Fax: +44-1334 463808; Tel: +44-1334 463826; E-mail: [eli.zysman-colman@st-andrews.ac.uk](mailto:eli.zysman-colman@st-andrews.ac.uk).

<sup>b</sup> Institute of Functional Nano & Soft Materials (FUNSOM), Joint International Research Laboratory of Carbon-Based Functional Materials and Devices, Soochow University, Suzhou, Jiangsu, 215123, P. R. China.

<sup>c</sup> Jiangsu Key Laboratory of Advanced Negative Carbon Technologies, Soochow University, Suzhou, Jiangsu, 215123, P. R. China.

<sup>d</sup> Department of Chemistry, Molecular Sciences Research Hub, Imperial College London, White City Campus, London, W12 0BZ, UK. E-mail: [m.fuchter@imperial.ac.uk](mailto:m.fuchter@imperial.ac.uk)

<sup>e</sup> Dipartimento di Chimica e Chimica Industriale, Università di Pisa, 56124 Pisa, Italy

<sup>f</sup> Université Paris-Saclay, ENS Paris-Saclay, CNRS, PPSM, 91190, Gif-sur-Yvette, France.

<sup>‡</sup> These authors contributed equally to this work.

## Table of Contents

|                                                      |     |
|------------------------------------------------------|-----|
| General information.....                             | S3  |
| Synthesis.....                                       | S8  |
| X-ray Crystallography.....                           | S33 |
| Photophysical characterization and computations..... | S35 |
| Devices .....                                        | S39 |
| Literature study.....                                | S41 |
| References .....                                     | S44 |

## **General information:**

### *General synthetic information.*

All reagents and solvents for the synthesis and characterization were obtained from commercial sources. Anhydrous THF and toluene were obtained from an MBraun SPS5 solvent purification system. Other chemicals were used directly without additional purification. Air-sensitive reactions were conducted under a nitrogen atmosphere using Schlenk techniques. Flash column chromatography was carried out using silica gel (Silia-P from Silicycle, 60 Å, 40-63 µm). Analytical thin-layer-chromatography (TLC) was performed with silica plates with plastic backings (250 µm with F-254 indicator). TLC visualization was accomplished by 365 nm UV lamp. Melting points were measured using open-ended capillaries on an Electrothermal 1101D Mel-Temp apparatus and are uncorrected. HPLC analysis was conducted on a Shimadzu LC-40 HPLC system. HPLC traces were performed using a Shim-pack GIST 3µm C18 reverse phase analytical column. <sup>1</sup>H and <sup>13</sup>C NMR spectra were measured using Bruker AVII 400 or Bruker AVIII-HD 500 NMR spectrometers. The following abbreviations have been used for multiplicity assignments: “s” for singlet, “d” for doublet, “t” for triplet, “dd” for doublet of doublets and “m” for multiplet. Deuterated chloroform (CDCl<sub>3</sub>), dichloromethane (CD<sub>2</sub>Cl<sub>2</sub>) or DMSO (DMSO-*d*<sub>6</sub>) was used as the solvent of record. <sup>1</sup>H NMR and <sup>13</sup>C NMR spectra were referenced to the solvent peak. Electrospray ionization (ESI) and Matrix-assisted laser desorption/ionization (MALDI) high-resolution mass spectrometry (HRMS) spectra were obtained at the University of Edinburgh Mass Spectrometry Facility. Elemental analyses were performed at London Metropolitan University. TGA/DSC analyses were performed on a Netzsch STA449C instrument under nitrogen gas at a 10 K/min heating rate.

### *Theoretical Calculations.*

All ground-state optimizations were carried out using Density Functional Theory (DFT) level with Gaussian 09<sup>1</sup> using the PBE0<sup>2</sup> functional and the 6-31G(d,p) basis set.<sup>3</sup> The simulated CD spectra, optimized geometry in S<sub>1</sub> states, electric and magnetic transition dipole moments were calculated using Time-Dependent DFT (TD-DFT) within the Tamm-Dancoff approximation

(TDA)<sup>4, 5</sup> at the M062X/6-31G(d,p) level of theory in THF. The transition state geometry was calculated at the M062X/6-31G(d,p) level. Frequency calculations identified this structure as a transition state as having only one imaginary frequency. Dissymmetry factor ( $g$ ) for emission was calculated using equation (1):

$$g = \frac{4|\boldsymbol{\mu}||\boldsymbol{m}|}{|\boldsymbol{\mu}|^2+|\boldsymbol{m}|^2} \cos\theta \quad (1)$$

Where  $\boldsymbol{\mu}$  and  $\boldsymbol{m}$  refer to the electric transition dipole moment and magnetic transition dipole moment vectors, respectively.  $\theta$  is the angle between  $\boldsymbol{\mu}$  and  $\boldsymbol{m}$ .<sup>6</sup> Molecular orbitals were visualized using GaussView 6.0 software.<sup>7</sup> Vertical excited states were also calculated using Spin-Component Scaling second-order algebraic diagrammatic construction (SCS-ADC2)/cc-pVDZ calculations based on the ground-state optimized structure using DFT method.<sup>8, 9</sup> Difference density plots were used to visualize change in electronic density between the ground and excited state and were visualized using the VESTA package.<sup>10</sup> Calculations were submitted and processed using Silico V3,<sup>11</sup> which incorporates a number of publicly available software libraries, including: cclib<sup>12</sup> for parsing of result files, VMD<sup>13</sup>/Tachyon<sup>14</sup> for 3D rendering, Matplotlib<sup>15</sup> for drawing of graphs, Open Babel<sup>16</sup>/Pybel<sup>17</sup> for file interconversion and PySOC<sup>18</sup> for the calculation of spin-orbit coupling.

#### *Electrochemical measurements.*

Cyclic Voltammetry (CV) analysis was performed on an Electrochemical Analyzer potentiostat model 620E from CH Instruments at a sweep rate of 100 mV/s. Differential pulse voltammetry (DPV) was conducted with an increment potential of 0.01 V and a pulse amplitude, width, and period of 50 mV, 0.06, and 0.5 s, respectively. All measurements were performed in degassed DCM with 0.1 M tetra-n-butylammonium hexafluorophosphate ( $[\text{tBu}_4\text{N}]\text{PF}_6$ ) as the supporting electrolyte and ferrocene/ferrocenium ( $\text{Fc}/\text{Fc}^+$ ) as the internal reference (0.46 V vs SCE).<sup>19</sup> An  $\text{Ag}/\text{Ag}^+$  electrode, a glassy carbon electrode and a platinum electrode were used as the reference electrode, working electrode and counter electrode, respectively. The HOMO and LUMO energies were determined using the relation  $\text{HOMO}/\text{LUMO} = -(E_{\text{ox}}/E_{\text{red}} \text{ vs } \text{Fc}/\text{Fc}^+)$

+4.8),<sup>20, 21</sup> where  $E_{\text{ox}}$  and  $E_{\text{red}}$  are the oxidation and reduction peak potentials versus Fc/Fc<sup>+</sup>, respectively, calculated from the DPV.

*Photophysical measurements:*

Optically dilute solutions of concentrations on the order of  $10^{-5}$  M were prepared in HPLC grade solvent for absorption and emission analysis. Absorption spectra were recorded at room temperature on a Shimadzu UV-2600 double beam spectrophotometer. Molar absorptivity determination was verified by linear regression analysis of values obtained from four independent solutions at varying concentrations from  $3 \times 10^{-6}$  to  $2 \times 10^{-5}$  M. For emission studies, steady-state photoluminescence (PL) spectra and time-resolved PL decays in solution were recorded at 298 K using Edinburgh Instruments FS5 fluorophotometer. Degassed solutions were prepared via three freeze-pump-thaw cycles and spectra/decays were measured using a home-made Schlenk quartz cuvette. Samples were excited at 340 nm for steady-state measurements. Time-resolved PL measurements of solutions were carried out using the time-correlated single-photon counting (TCSPC) technique. The samples were excited at 375 nm with a pulsed laser diode. Photoluminescence quantum yields for solutions were determined using the optically dilute method,<sup>22</sup> in which four sample solutions with absorbances between 0.2 to 0.02 at 350 nm were used. The Beer-Lambert law was found to remain linear at the concentrations of the solutions. For each sample, linearity between absorption and emission intensity was verified through linear regression analysis with the Pearson regression factor ( $R^2$ ) for the linear fit of the data set surpassing 0.9. Individual relative quantum yield values were calculated for each solution and the values reported represent the slope obtained from the linear fit of these results. The quantum yield of the sample,  $\Phi_{\text{PL}}$ , can be determined by the equation  $\Phi_{\text{PL}} = \left( \Phi_r * \frac{A_r}{A_s} * \frac{I_s}{I_r} * \frac{n_s^2}{n_r^2} \right)$ , where A stands for the absorbance at the excitation wavelength ( $\lambda_{\text{exc}}$ : 350 nm), I is the integrated area under the corrected emission curve and n is the refractive index of the solvent with the subscripts “s” and “r” representing sample and reference respectively.<sup>23</sup>  $\Phi_r$  is the absolute quantum yield of the external reference quinine sulfate ( $\Phi_r = 54.6\%$  in 0.5 M H<sub>2</sub>SO<sub>4</sub>).<sup>24</sup> The experimental uncertainty in the PL quantum yields is conservatively estimated to be 10%, though we have found that statistically we can reproduce

$\Phi_{\text{PL}}$  values to 3% relative error. The  $\Delta E_{\text{ST}}$  of solution samples were estimated from the difference in energy of the onsets of the SS PL and phosphorescence spectra at 77 K. Samples were excited by a xenon flashlamp emitting at 340 nm (EI FS5, SC-70). Phosphorescence spectra were measured with a time-gated window of 1-10 ms.

Thin doped films of emitters in a host matrix were spin-coated on a quartz substrate (for quantum yield measurements) or a sapphire substrate (for time-resolved PL measurements) using a spin speed of 1500 rpm for 60 s to give a thickness of ~80 nm. An integrating sphere (Edinburgh Instruments FS5, SC30 module) was employed for quantum yield measurements for thin film samples. The  $\Phi_{\text{PL}}$  of the films were measured in air and then in  $\text{N}_2$ , by purging the integrating sphere with  $\text{N}_2$  gas flow for 2 min. The photophysical properties of the film samples were measured using an Edinburgh Instruments FS5 fluorimeter. Time-resolved PL measurements of the thin films were carried out using the multi-channel scaling (MCS) and TCSPC technique. The samples were excited at 375 nm by a pulsed laser diode or a xenon flashlamp and were kept in a vacuum of  $< 8 \times 10^{-4}$  mbar.

Enantiomers were isolated using a Chiralpak IE column (10 mm I.D. x 250 mm) with hexane:THF 95:5 as the mobile phase, a  $5 \text{ ml min}^{-1}$  flowrate and UV monitoring at 360 nm. Two successive injections were carried out to ensure the maximal purity in the sample. Subsequent analytical chPLC revealed high enantiopurity (*ee*. 99% for (*P*)-**tBuPh-BN**, 97% for (*M*)-**tBuPh-BN**, 99% for (*P*)-**DPA-tBuPh-BN** and 99% for (*M*)-**DPA-tBuPh-BN**) (Figures S24 and S25). Circular dichroism (CD) measurements were conducted using an Applied Photophysics Chirascan spectrophotometer in  $4.7 \times 10^{-6}$  M toluene solutions at a measuring rate of 1 s per point. The dissymmetry factor ( $g_{\text{abs}}$ ) was calculated using the equation  $g_{\text{abs}} = \Delta A/A$ , where  $A = 0.5 \times (A_{\text{L}} + A_{\text{R}})$  and represents the UV-Vis absorption of the sample.  $A_{\text{L}}$  and  $A_{\text{R}}$  represent the absorption of left- and right-handed light, respectively.  $\Delta A$  is calculated through the following equation  $\Delta A = \text{CD (mdeg)} / 32980$ , where CD (mdeg) represents the CD signal in mdeg units. Circularly polarized luminescence (CPL) measurements were performed using a homemade spectrofluoropolarimeter.<sup>25</sup> The spectra were run in  $1 \times 10^{-5}$  M solutions in THF. The samples were excited by 365 nm radiation (LED source) with a  $90^\circ$  geometry

between excitation and detection. The exciting beam was linearly polarized parallel to the direction of detection. The spectra were baseline-corrected by subtraction of the spectrum of the racemic compound. Parameters used: bandwidth 6 nm, scan speed 1 nm/sec, integration time 2 sec, PMT voltage 500 V, accumulations 6.

*Fitting of the time-resolved PL decays:*

Time-resolved PL measurements were fitted to a sum of exponentials decay model, with chi-squared ( $\chi^2$ ) values between 1 and 2, using the EI FS5 software. Each component of the decay is assigned a weight, ( $w_i$ ), which is the contribution of the emission from each component to the total emission.

The average lifetime was then calculated using the following:

- Two exponential decay model:

$$\tau_{AVG} = \tau_1 w_1 + \tau_2 w_2$$

with weights defined as  $w_1 = \frac{A_1 \tau_1}{A_1 \tau_1 + A_2 \tau_2}$  and  $w_2 = \frac{A_2 \tau_2}{A_1 \tau_1 + A_2 \tau_2}$  where  $A_1$  and  $A_2$  are the preexponential-factors of each component.

- Three exponential decay model:

$$\tau_{AVG} = \tau_1 w_1 + \tau_2 w_2 + \tau_3 w_3$$

with weights defined as  $w_1 = \frac{A_1 \tau_1}{A_1 \tau_1 + A_2 \tau_2 + A_3 \tau_3}$ ,  $w_2 = \frac{A_2 \tau_2}{A_1 \tau_1 + A_2 \tau_2 + A_3 \tau_3}$  and  $w_3 = \frac{A_3 \tau_3}{A_1 \tau_1 + A_2 \tau_2 + A_3 \tau_3}$  where  $A_1$ ,  $A_2$  and  $A_3$  are the preexponential-factors of each component.

*OLED Fabrication and Characterization:*

OLEDs were fabricated on the indium-tin oxide (ITO) coated transparent glass substrates with multiple layers. The ITO glass substrates have a thickness of ca. 100 nm and a sheet resistance of ca. 30  $\Omega$  per square and were cleaned with optical detergent, deionized water, acetone, and isopropanol successively and then dried in an oven. For vacuum-evaporated OLEDs, the ITO

substrates were exposed to UV ozone for 15 minutes initially. All the organic materials were thermally evaporated at a rate of  $1 \text{ \AA s}^{-1}$  under a vacuum of ca.  $10^{-5}$  Torr. Finally, LiF and Al were successively deposited at a rate of  $0.1 \text{ \AA s}^{-1}$  and  $5 \text{ \AA s}^{-1}$ , respectively. Four identical OLED devices were formed on each of the substrates and the emission area of  $0.09 \text{ cm}^2$  for each device. The EL performances of the devices were measured with a PHOTO RESEARCH Spectra Scan PR 655 PHOTOMETER and a KEITHLEY 2400 Source Meter constant current source at room temperature.

### Synthesis:

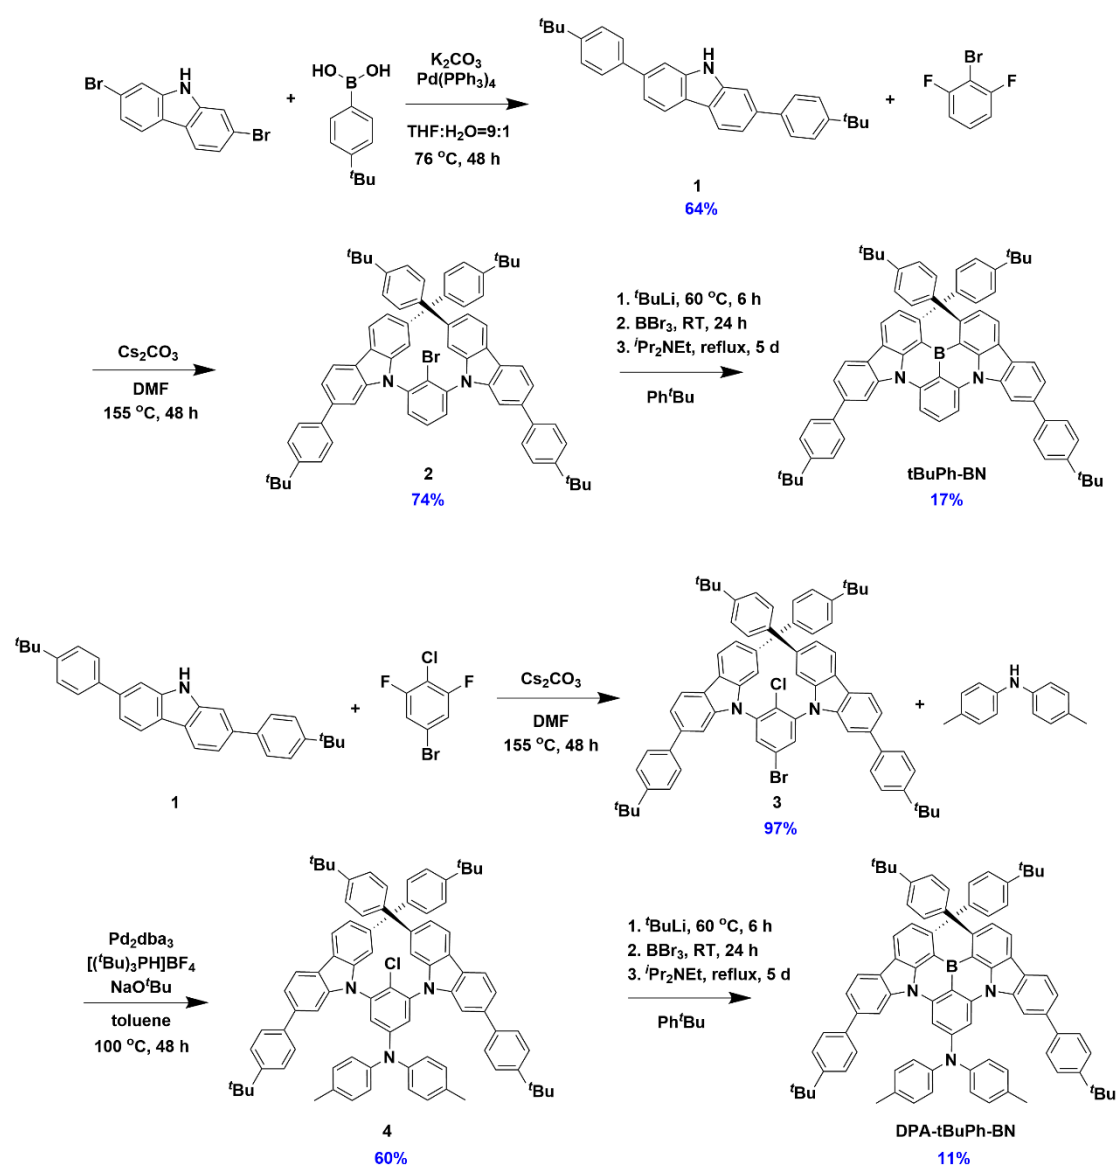

Figure S1. Synthesis scheme of **tBuPh-BN** and **DPA-*t*BuPh-BN**.



### 2,7-bis(4-(*tert*-butyl)phenyl)-9*H*-carbazole (**1**)

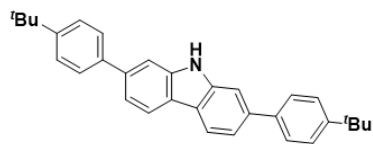

2,7-dibromo-9*H*-carbazole (2.00 g, 6.15 mmol, 1 equiv.), (4-*tert*-butyl)phenyl boronic acid (2.41 g, 13.5 mmol, 2.2 equiv.) and Pd(PPh<sub>3</sub>)<sub>4</sub> (356 mg, 308 μmol, 0.05 equiv.) were added to a mixture of THF (36 mL) and 5 mol L<sup>-1</sup> potassium carbonate aqueous solution (4 mL). The reaction was stirred at 76 °C under nitrogen for 48 hours. After cooling to room temperature, the reaction was quenched by adding water and extracted with 3 × 50 mL dichloromethane. The combined organic phase was then concentrated under reduced pressure. The crude product was washed with hexane and methanol to obtain compound **1** as a beige powder. **Yield** 64%, 1.70 g. **Mp**: 324-325 °C. **R<sub>f</sub>**: 0.1 (dichloromethane: hexane = 1:4). **<sup>1</sup>H NMR (400 MHz, DMSO-*d*<sup>6</sup>)** δ 11.37 (s, 1H), 8.17 (d, *J* = 8.1 Hz, 2H), 7.73 – 7.65 (m, 6H), 7.55 – 7.49 (m, 4H), 7.46 (dd, *J* = 8.2, 1.6 Hz, 2H), 1.34 (s, 18H). **<sup>13</sup>C NMR (126 MHz, DMSO-*d*<sup>6</sup>)** δ 149.97, 141.40, 138.79, 138.25, 127.12, 126.19, 121.93, 121.08, 118.37, 109.11, 34.72, 31.64. **HRMS (ESI-MS):** [C<sub>32</sub>H<sub>33</sub>N + H]<sup>+</sup> **Calculated:** 432.2686; **Found:** 432.2684.

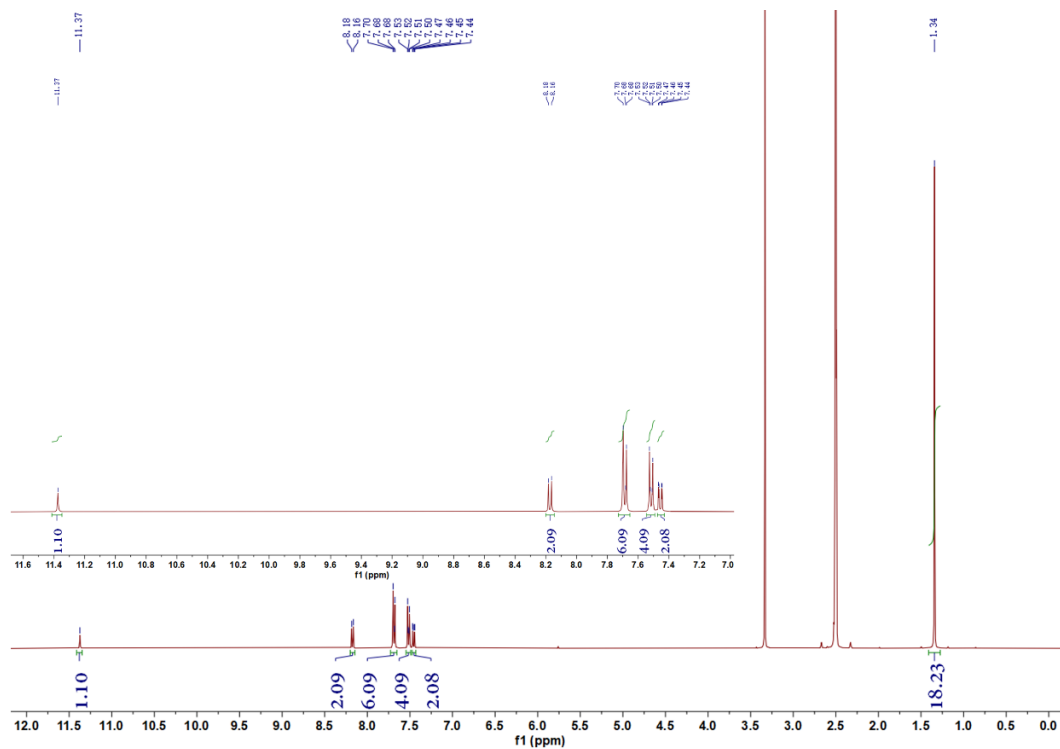

Figure S2.  $^1\text{H}$  NMR spectrum of **1** in  $\text{DMSO-}d_6$ .

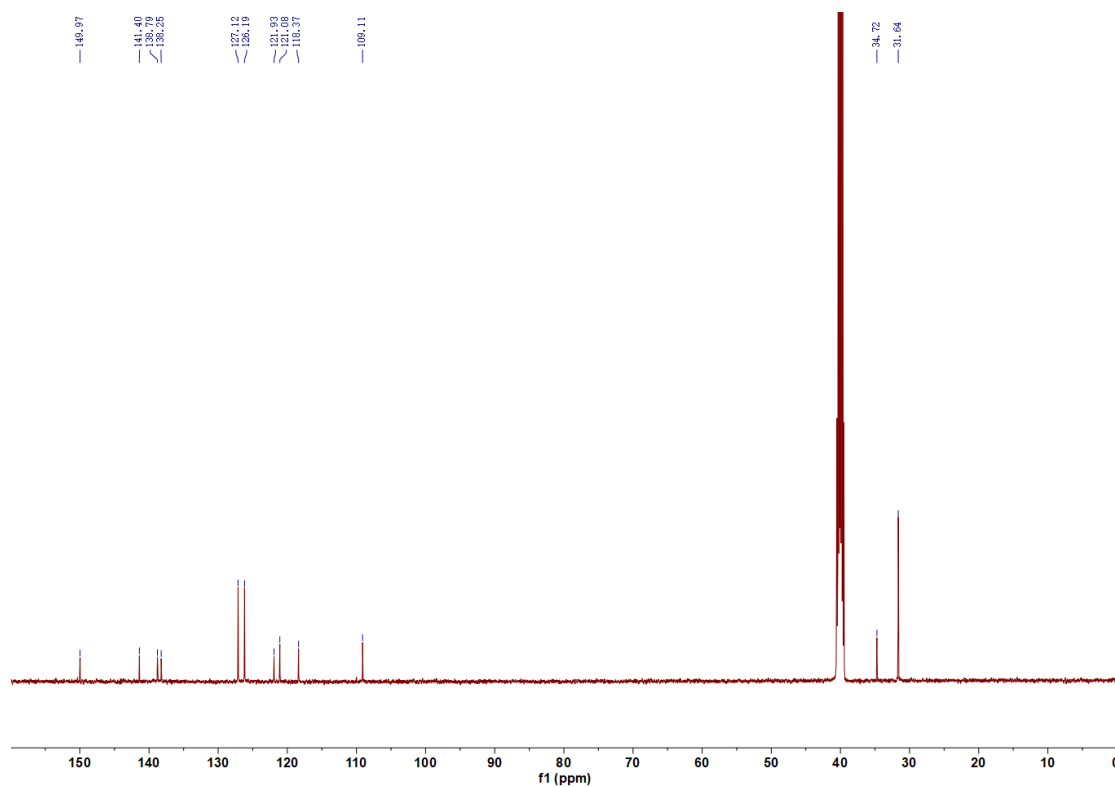

Figure S3.  $^{13}\text{C}$  NMR spectrum of **1** in  $\text{DMSO-}d_6$ .

## Display Report

|                                                                                                                                                                                                         |                                                                                                        |
|---------------------------------------------------------------------------------------------------------------------------------------------------------------------------------------------------------|--------------------------------------------------------------------------------------------------------|
| <b>Analysis Info</b><br>Analysis Name: D:\Data\Alans Data Aug 2021\STA_Jingxiang Wang tBuPCz.d<br>Method: 010713alanstune_low.m<br>Sample Name: Jingxiang Wang tBuPCz<br>Comment: Jingxiang Wang tBuPCz | Acquisition Date: 8/13/2021 1:56:49 PM<br>Operator: Bruker UK<br>Instrument: micrOTOF<br>8213750.10408 |
|---------------------------------------------------------------------------------------------------------------------------------------------------------------------------------------------------------|--------------------------------------------------------------------------------------------------------|

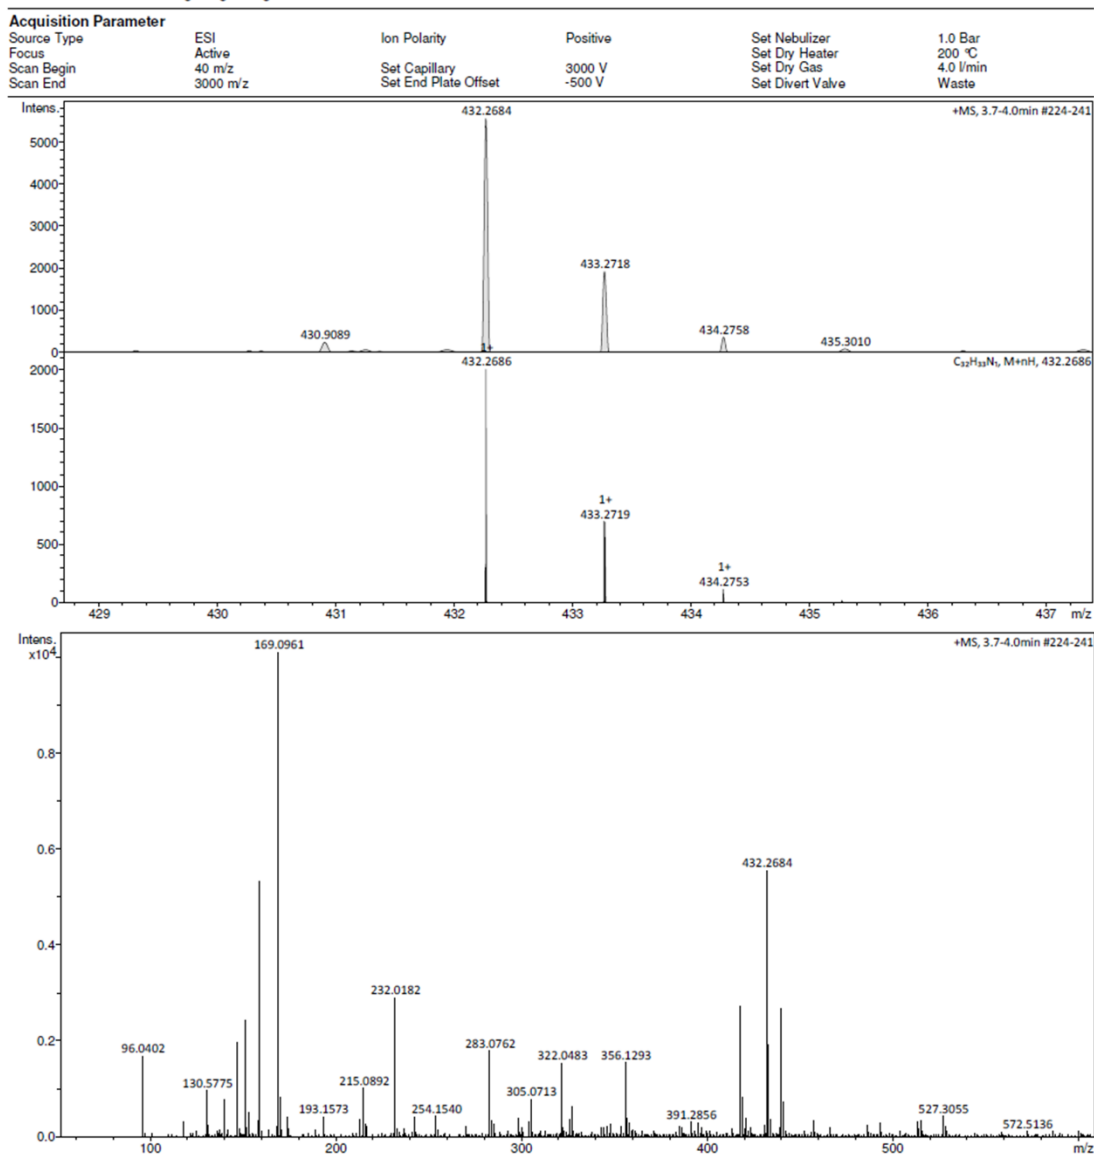

Figure S4. HRMS spectrum of **1**.

### 9,9'-(2-bromo-1,3-phenylene)bis(2,7-bis(4-*tert*-butyl)phenyl)-9*H*-carbazole (**2**)

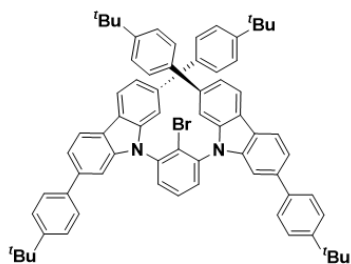

Compound **1** (492 mg, 1.14 mmol, 2.2 equiv.), 2-bromo-1,3-difluorobenzene (100 mg, 0.518 mmol, 1 equiv.), cesium carbonate (844 mg, 2.59  $\mu\text{mol}$ , 5 equiv.) and DMF (8 mL) were added to a 2-neck Schlenk tube. The mixture was stirred at 155  $^{\circ}\text{C}$  under nitrogen for 48 hours. After cooling to room temperature, the reaction mixture reaction was quenched by adding water and extracted with  $3 \times 50$  mL dichloromethane. The combined organic phase was then concentrated under reduced pressure. The crude product was washed with methanol and hexane to obtain compound **2** as a white solid. **Yield** 74%, 389 mg. **Mp**:  $> 395$   $^{\circ}\text{C}$ . **R<sub>f</sub>**: 0.4 (dichloromethane: hexane= 1: 4).  **$^1\text{H}$  NMR (400 MHz,  $\text{CDCl}_3$ )**  $\delta$  8.24 – 8.19 (m, 4H), 7.74 (s, 3H), 7.59 (dd,  $J = 8.3, 2.7$  Hz, 12H), 7.43 (d,  $J = 8.5$  Hz, 8H), 7.38 (d,  $J = 1.0$  Hz, 4H), 1.33 (s, 36H).  **$^{13}\text{C}$  NMR (126 MHz,  $\text{CDCl}_3$ )**  $\delta$  150.16, 141.78, 139.57, 139.30, 138.91, 131.35, 129.62, 127.17, 125.75, 125.61, 122.40, 120.66, 120.12, 108.48, 34.53, 31.40. **HRMS (ESI-MS):**  $[\text{C}_{70}\text{H}_{67}\text{BrN}_2 + \text{NH}_4]^+$  **Calculated:** 1032.4826; **Found:** 1032.4782.

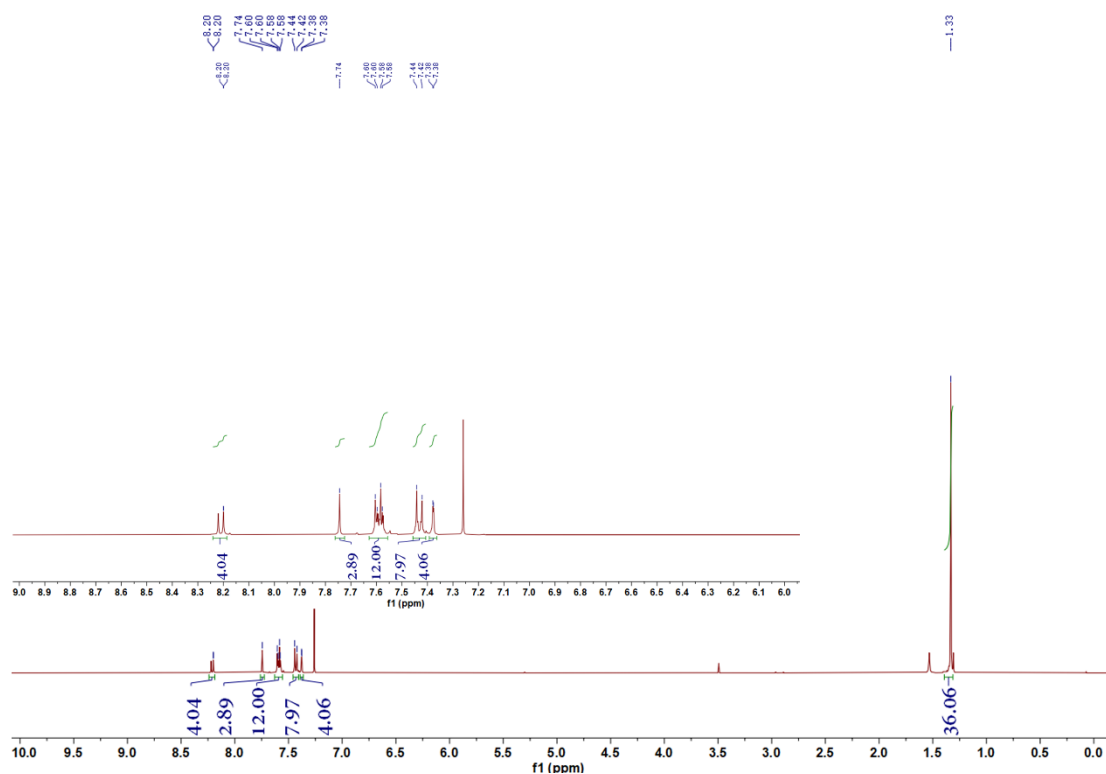

Figure S5.  $^1\text{H}$  NMR spectrum of **2** in  $\text{CDCl}_3$ .

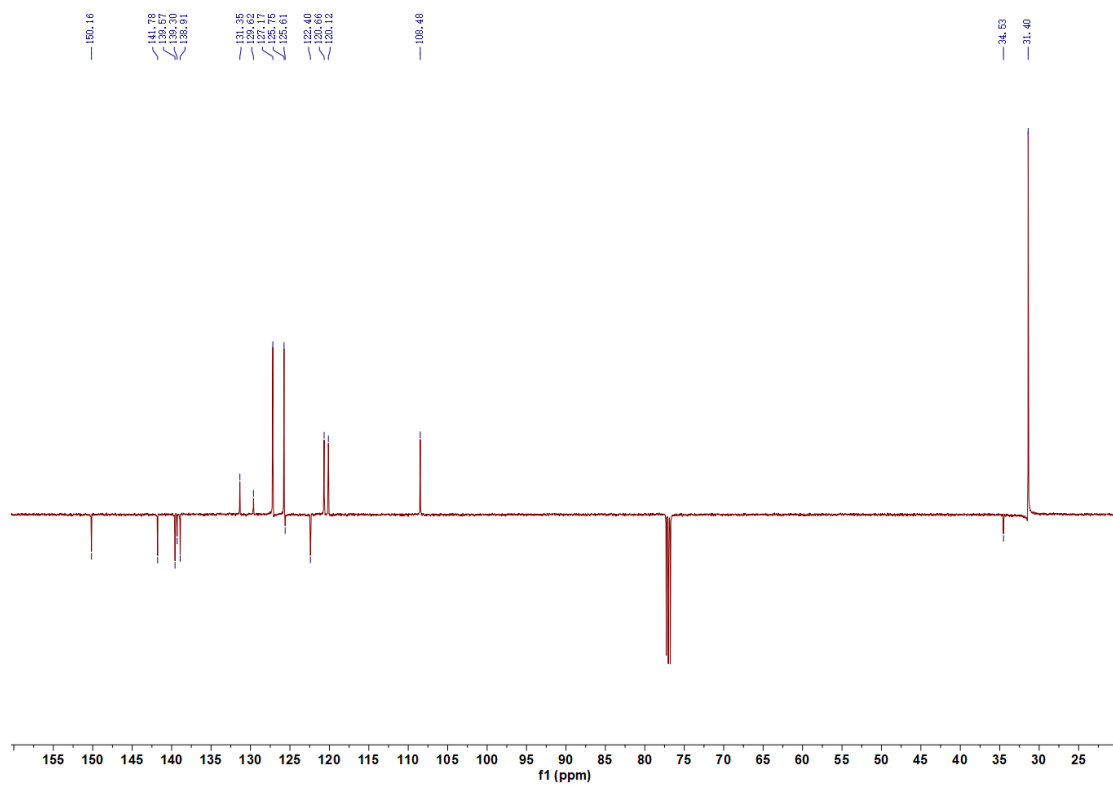

Figure S6. DEPTQ  $^{13}\text{C}$  NMR spectrum of **2** in  $\text{CDCl}_3$ .

## Display Report

|                      |                                                          |                  |                      |               |
|----------------------|----------------------------------------------------------|------------------|----------------------|---------------|
| <b>Analysis Info</b> |                                                          | Acquisition Date | 7/15/2021 1:06:41 PM |               |
| Analysis Name        | D:\Data\Alans Data July 2021\STA_Jingxiang Wang BuCzPh.d | Operator         | Bruker UK            |               |
| Method               | 010713alanstune_low.m                                    | Instrument       | micrOTOF             | 8213750.10408 |
| Sample Name          | Jingxiang Wang BuCzPh                                    |                  |                      |               |
| Comment              | Jingxiang Wang BuCzPh                                    |                  |                      |               |

|                              |          |                      |          |                  |           |
|------------------------------|----------|----------------------|----------|------------------|-----------|
| <b>Acquisition Parameter</b> |          |                      |          |                  |           |
| Source Type                  | ESI      | Ion Polarity         | Positive | Set Nebulizer    | 1.0 Bar   |
| Focus                        | Active   | Set Capillary        | 3000 V   | Set Dry Heater   | 200 °C    |
| Scan Begin                   | 40 m/z   | Set End Plate Offset | -500 V   | Set Dry Gas      | 4.0 l/min |
| Scan End                     | 3000 m/z |                      |          | Set Divert Valve | Waste     |

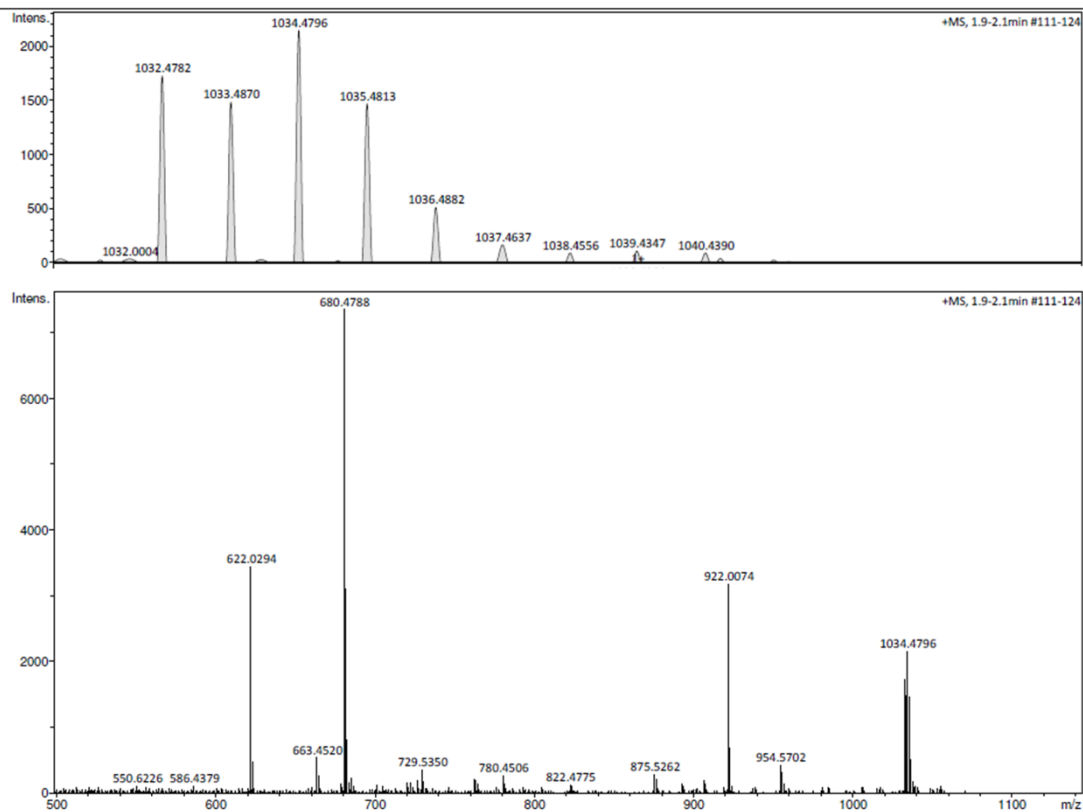

Figure S7. HRMS spectrum of **2**.

### tBuPh-BN

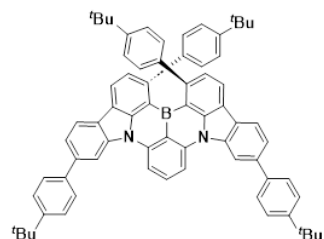

A solution of *t*-butyllithium in pentane (0.868 mL, 1.7 M, 1.48 mmol, 3 equiv.) was added slowly to a solution of **2** (0.500 g, 0.492 mmol, 1.0 equiv.) in *tert*-butylbenzene (11 mL) at -

78 °C under a nitrogen atmosphere. Then the reaction was stirred at 60 °C for 6 h. After that, boron tribromide (0.698 mL, 7.38 mmol, 15 equiv.) was added slowly at -78 °C. The reaction mixture was then allowed to warm to room temperature and stirred for 24 h. *N,N*-diisopropylethylamine (0.514 mL, 2.95 mmol, 6 equiv.) was then added at 0 °C. After stirring under reflux for 5 days, the reaction mixture was quenched by adding 50 mL water and extracted with 3× 50 mL dichloromethane. The organic phase was then separated and concentrated under reduced pressure. The crude product was purified by column chromatography on silica gel (dichloromethane: hexane = 1: 8) to afford **tBuPh-BN** as a yellow powder. **Yield** 17%, 79 mg. **Mp**: 340-342 °C. **R<sub>f</sub>**: 0.3 (dichloromethane: hexane = 1: 5). **<sup>1</sup>H NMR (500 MHz, CDCl<sub>3</sub>)** δ 8.68 (s, 2H), 8.38 (d, *J* = 8.3 Hz, 2H), 8.28 (d, *J* = 8.0 Hz, 2H), 8.15 (d, *J* = 7.8 Hz, 2H), 8.04 (t, *J* = 8.2 Hz, 1H), 7.79 (d, *J* = 8.4 Hz, 4H), 7.71 (dd, *J* = 8.0, 1.1 Hz, 2H), 7.61 (d, *J* = 8.4 Hz, 4H), 7.32 (d, *J* = 7.8 Hz, 2H), 6.87 (d, *J* = 7.5 Hz, 4H), 6.70 (d, *J* = 8.4 Hz, 4H), 1.44 (s, 18H), 1.29 (s, 18H). **<sup>13</sup>C NMR (126 MHz, CDCl<sub>3</sub>)** δ 150.51, 149.90, 146.95, 143.01, 141.26, 140.40, 139.95, 139.19, 137.34, 132.46, 131.39, 127.41, 126.04, 125.95, 123.98, 123.16, 122.38, 121.71, 121.54, 121.06, 120.12, 113.13, 108.19, 34.66, 34.35, 31.46, 31.32. **HRMS (ESI-MS):** [C<sub>70</sub>H<sub>65</sub>BN<sub>2</sub> +H]<sup>+</sup> **Calculated:** 945.5314; **Found:** 945.5313. **Anal. Calcd. For C<sub>70</sub>H<sub>65</sub>BN<sub>2</sub>:** C 88.96%, H 6.93%, N 2.96% **Found:** C 89.12%, H 6.24%, N 2.43%. **HPLC (80% Tetrahydrofuran and 20% Water):** 99.29% pure, retention time 10.391 min.

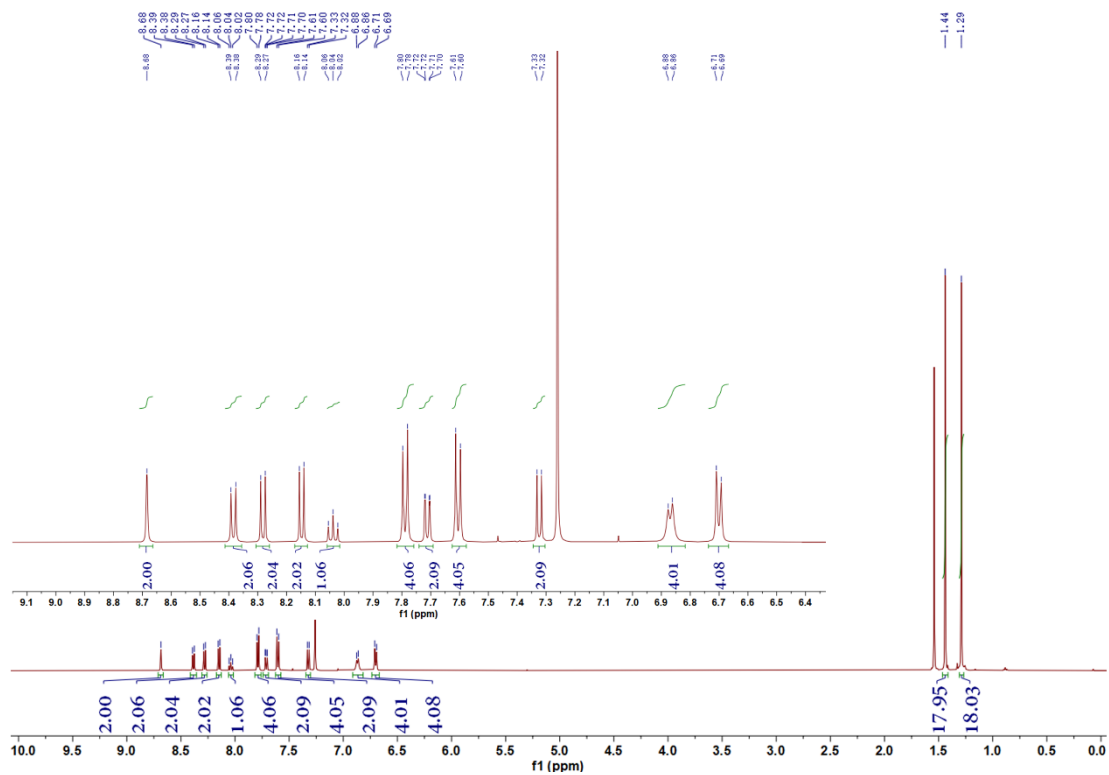

Figure S8. <sup>1</sup>H NMR spectrum of **tBuPh-BN** in CDCl<sub>3</sub>.

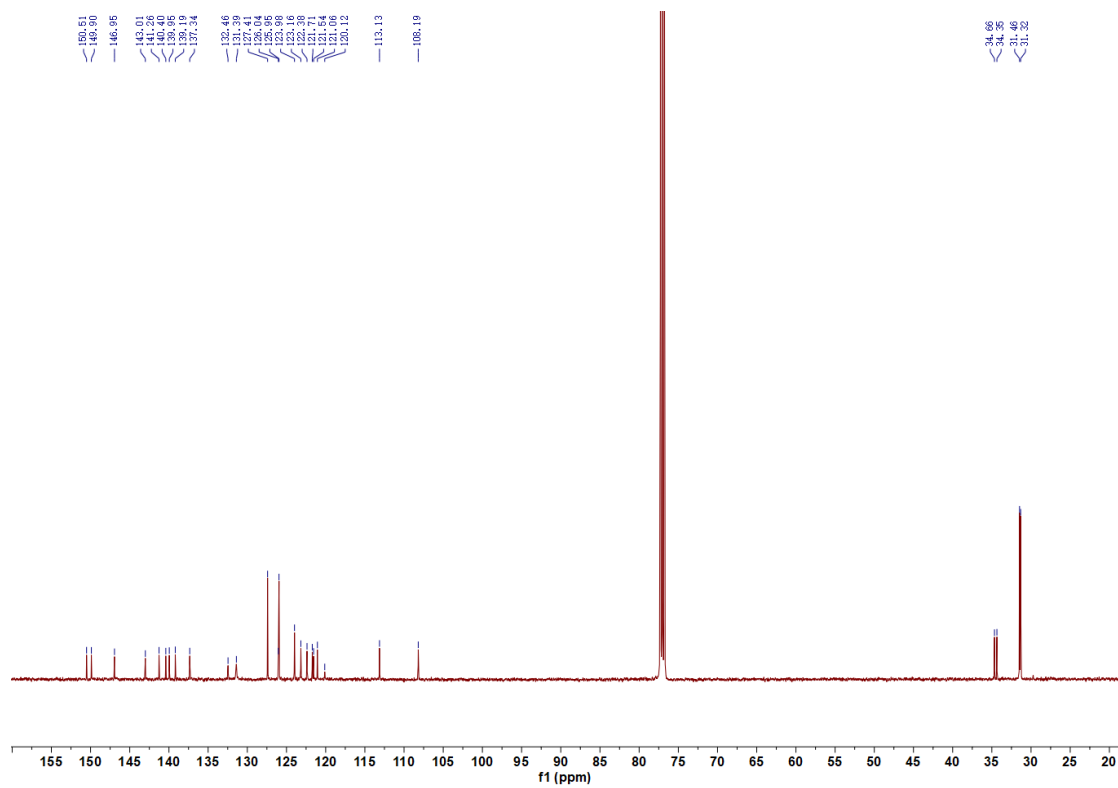

Figure S9. <sup>13</sup>C NMR spectrum of **tBuPh-BN** in CDCl<sub>3</sub>.



# Display Report

**Analysis Info**  
Analysis Name: D:\Data\Alans Data Sept 2021\STA\_Jingxiang Wang tBuPhBN.d  
Method: 010713alanstune\_low.m  
Sample Name: Jingxiang Wang tBuPhBN  
Comment: Jingxiang Wang tBuPhBN  
Acquisition Date: 9/22/2021 3:05:10 PM  
Operator: Bruker UK  
Instrument: micrOTOF  
8213750.10408

**Acquisition Parameter**  
Source Type: ESI  
Focus: Active  
Scan Begin: 40 m/z  
Scan End: 3000 m/z  
Ion Polarity: Positive  
Set Capillary: 3000 V  
Set End Plate Offset: -500 V  
Set Nebulizer: 1.0 Bar  
Set Dry Heater: 200 °C  
Set Dry Gas: 4.0 l/min  
Set Divert Valve: Waste

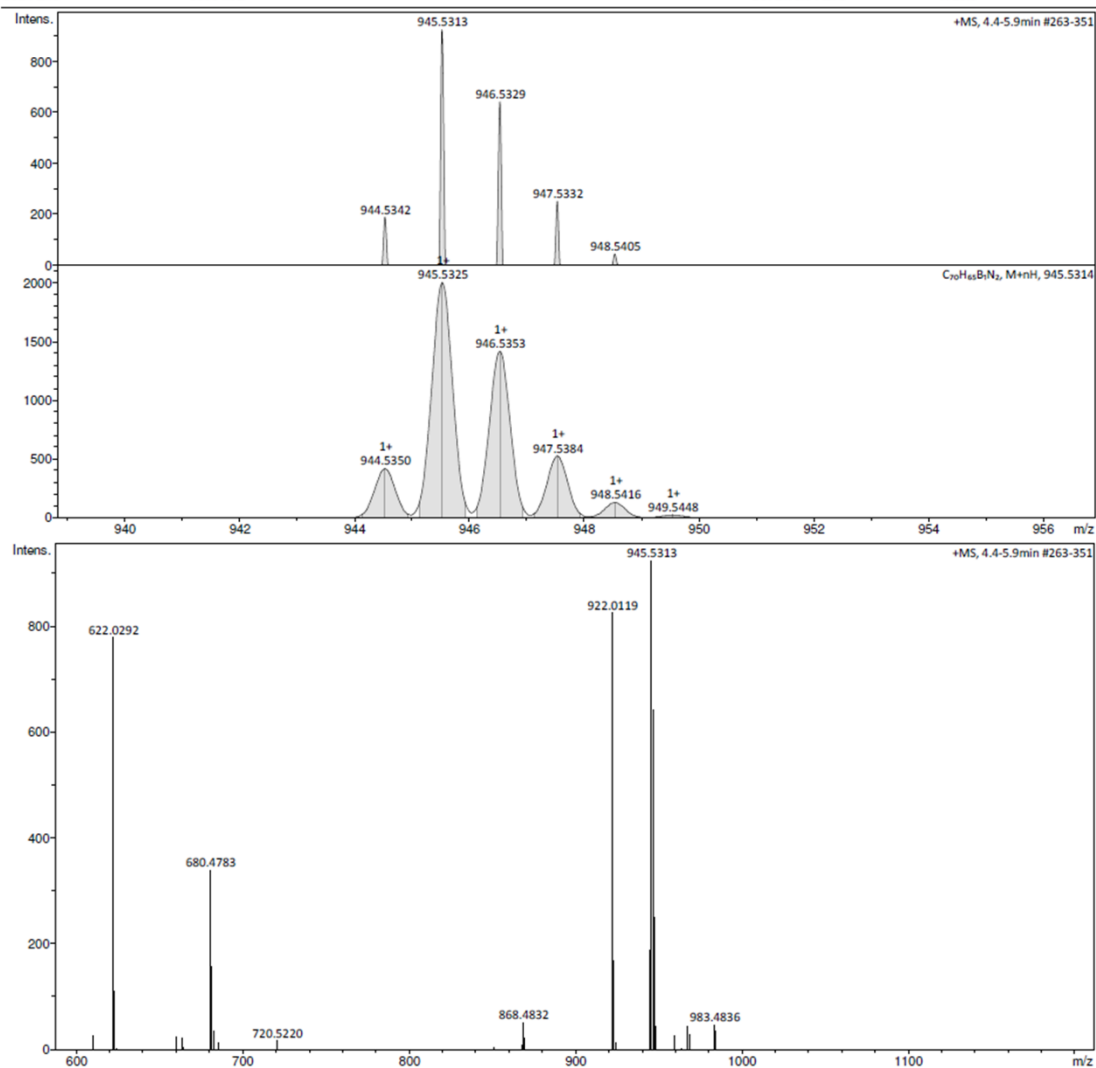

Figure S10. HRMS spectrum of tBuPh-BN.

### Elemental Analysis Sample Results

**Name** Jingxiang Wang  
**Organisation Name** University of St Andrews  
**Purchase order number**

| Standard – Acetanilide |                  |       |
|------------------------|------------------|-------|
| Element                | Expected %       | Found |
| Carbon                 | 71.10 (+/- 0.23) | 71.02 |
| Hydrogen               | 6.71 (+/- 0.07)  | 6.64  |
| Nitrogen               | 10.34 (+/- 0.09) | 10.29 |

| Analysis – tBuPh-BN |            |           |           |
|---------------------|------------|-----------|-----------|
| Element             | Expected % | Found (1) | Found (2) |
| Carbon              | 88.96      | 89.08     | 89.17     |
| Hydrogen            | 6.93       | 6.39      | 6.09      |
| Nitrogen            | 2.96       | 2.48      | 2.37      |

|                       |               |
|-----------------------|---------------|
| <b>Date completed</b> | 16.04.2024    |
| <b>Signature</b>      | O. McCullough |
| <b>Comments</b>       |               |

Figure S11. Elemental analysis data of tBuPh-BN.

# HPLC Trace Report02Aug2023

## <Sample Information>

Sample Name : tbuphn  
Sample ID :  
Method Filename : 80% THF 20% water 0.6 mlmin 20 mins.lcm  
Batch Filename : 01082023.lcb  
Vial # : 2-8  
Injection Volume : 5 uL  
Date Acquired : 02/08/2023 13:35:36  
Date Processed : 02/08/2023 13:55:39  
Sample Type : Unknown  
Acquired by : System Administrator  
Processed by : System Administrator

## <Chromatogram>

mV

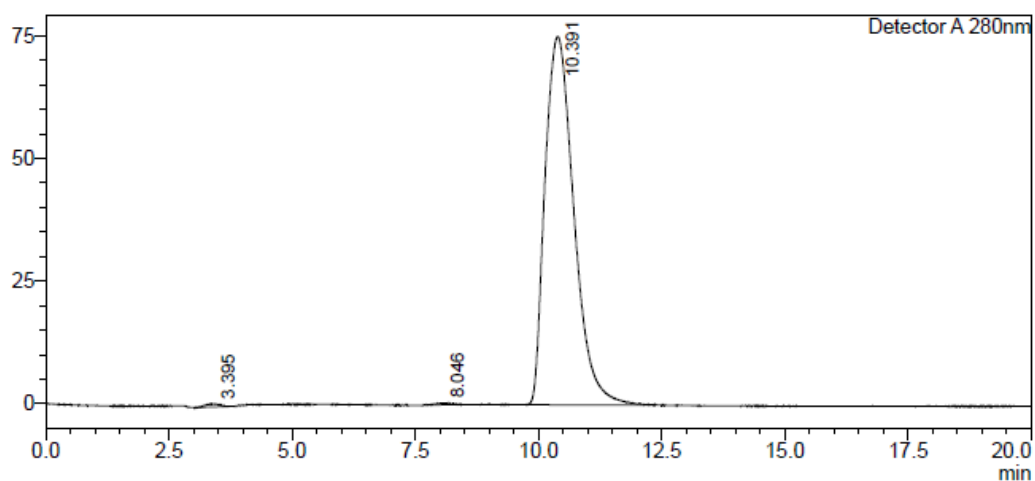

## <Peak Table>

Detector A 280nm

| Peak# | Ret. Time | Area    | Height | Area%   | Area/Height | Width at 5% Height |
|-------|-----------|---------|--------|---------|-------------|--------------------|
| 1     | 3.395     | 13253   | 616    | 0.430   | 21.531      | 0.589              |
| 2     | 8.046     | 8751    | 355    | 0.284   | 24.669      | 0.683              |
| 3     | 10.391    | 3061798 | 75061  | 99.286  | 40.791      | 1.330              |
| Total |           | 3083802 | 76031  | 100.000 |             |                    |

Figure S12. HPLC spectrum of **tBuPh-BN**.

**9,9'-(5-bromo-2-chloro-1,3-phenylene)bis(2,7-bis(4-(*tert*-butyl)phenyl)-9*H*-carbazole) (3)**

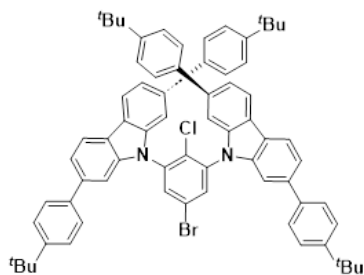

Compound **1** (1.59 g, 3.69 mmol, 2.1 equiv.), 5-bromo-2-chloro-1,3-difluorobenzene (400 mg, 1.76 mmol, 1 equiv.), cesium carbonate (2.87g, 8.79 mmol, 5 equiv.) and DMF (15 mL) were added to a 2-neck Schlenk tube. The mixture was stirred at 155 °C under nitrogen for 72 hours. After cooling to room temperature, the reaction mixture reaction was quenched by adding water and extracted with 3× 50 mL dichloromethane. The organic phase was then separated and concentrated under reduced pressure. The crude product was washed with methanol and hexane to obtain compound **3** as a pale yellow solid. **Yield** 97%, 1.80 g. **Mp**: 382-384 °C. **R<sub>f</sub>**: 0.5 (dichloromethane: hexane= 1: 3.5). **<sup>1</sup>H NMR (400 MHz, CDCl<sub>3</sub>)** δ 8.20 (d, *J* = 8.0 Hz, 4H), 7.93 (s, 2H), 7.60 (d, *J* = 8.5 Hz, 12H), 7.44 (d, *J* = 8.5 Hz, 8H), 7.40 – 7.36 (m, 4H), 1.34 (s, 36H). **<sup>13</sup>C NMR (126 MHz, CDCl<sub>3</sub>)** δ 150.29, 141.61, 139.81, 138.75, 138.46, 134.05, 133.00, 127.18, 125.80, 122.60, 120.75, 120.49, 108.27, 34.55, 31.40. **HRMS (ESI-MS):** [C<sub>70</sub>H<sub>66</sub>BrClN<sub>2</sub> +H]<sup>+</sup> **Calculated:** 1049.4171; **Found:** 1049.4154. [C<sub>70</sub>H<sub>66</sub><sup>81</sup>BrClN<sub>2</sub> +NH<sub>4</sub>]<sup>+</sup> **Calculated:** 1068.4416; **Found:** 1068.4431.

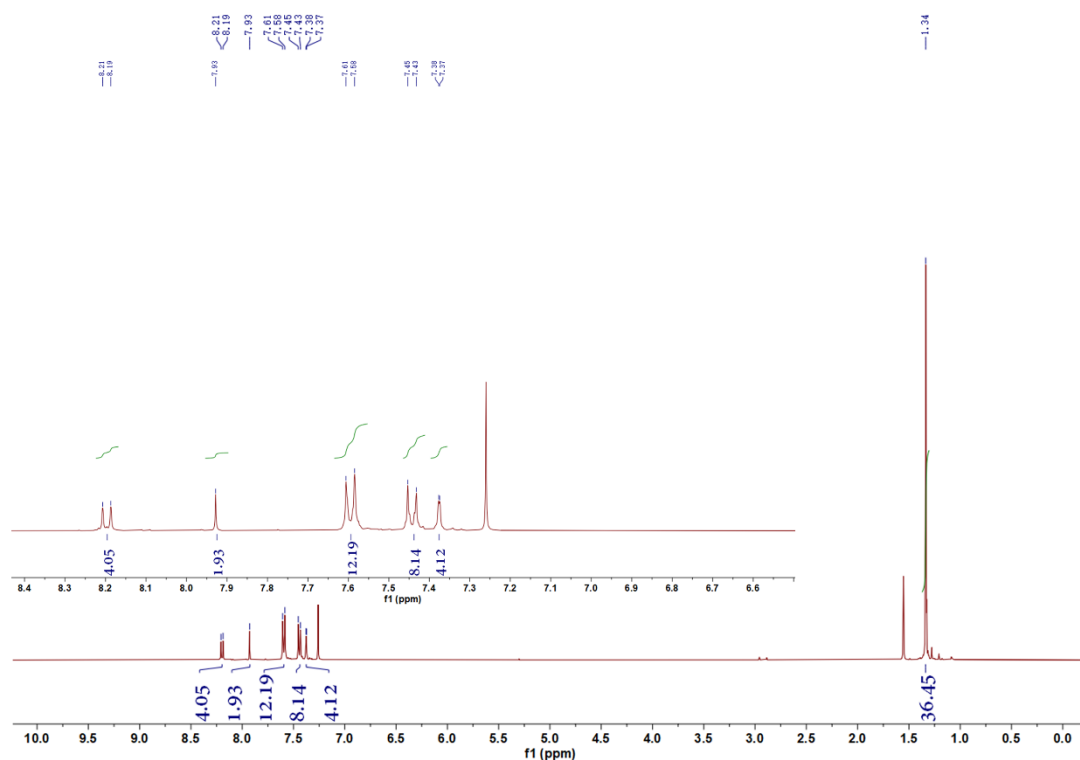

Figure S13. <sup>1</sup>H NMR spectrum of **3** in CDCl<sub>3</sub>.

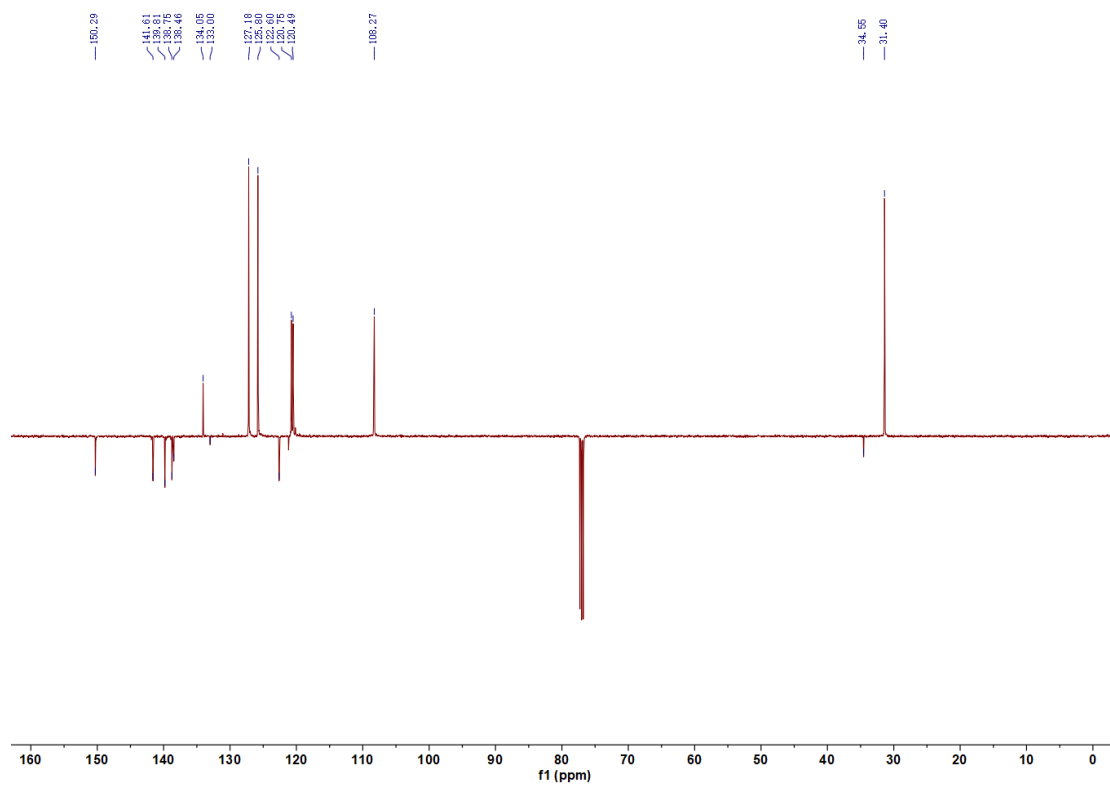

Figure S14. DEPTQ <sup>13</sup>C NMR spectrum of **3** in CDCl<sub>3</sub>.

## Display Report

|                      |                                                           |                  |                       |  |
|----------------------|-----------------------------------------------------------|------------------|-----------------------|--|
| <b>Analysis Info</b> |                                                           | Acquisition Date | 11/23/2021 4:34:28 PM |  |
| Analysis Name        | D:\Data\Alans Data Nov 2021\STA_Jingxiang Wang CzPhClBr.d | Operator         | Bruker UK             |  |
| Method               | UpdatedVGDalanstune_low_051121.m                          | Instrument       | micrOTOF              |  |
| Sample Name          | Jingxiang Wang CzPhClBr                                   |                  | 8213750.10408         |  |
| Comment              | Jingxiang Wang CzPhClBr                                   |                  |                       |  |

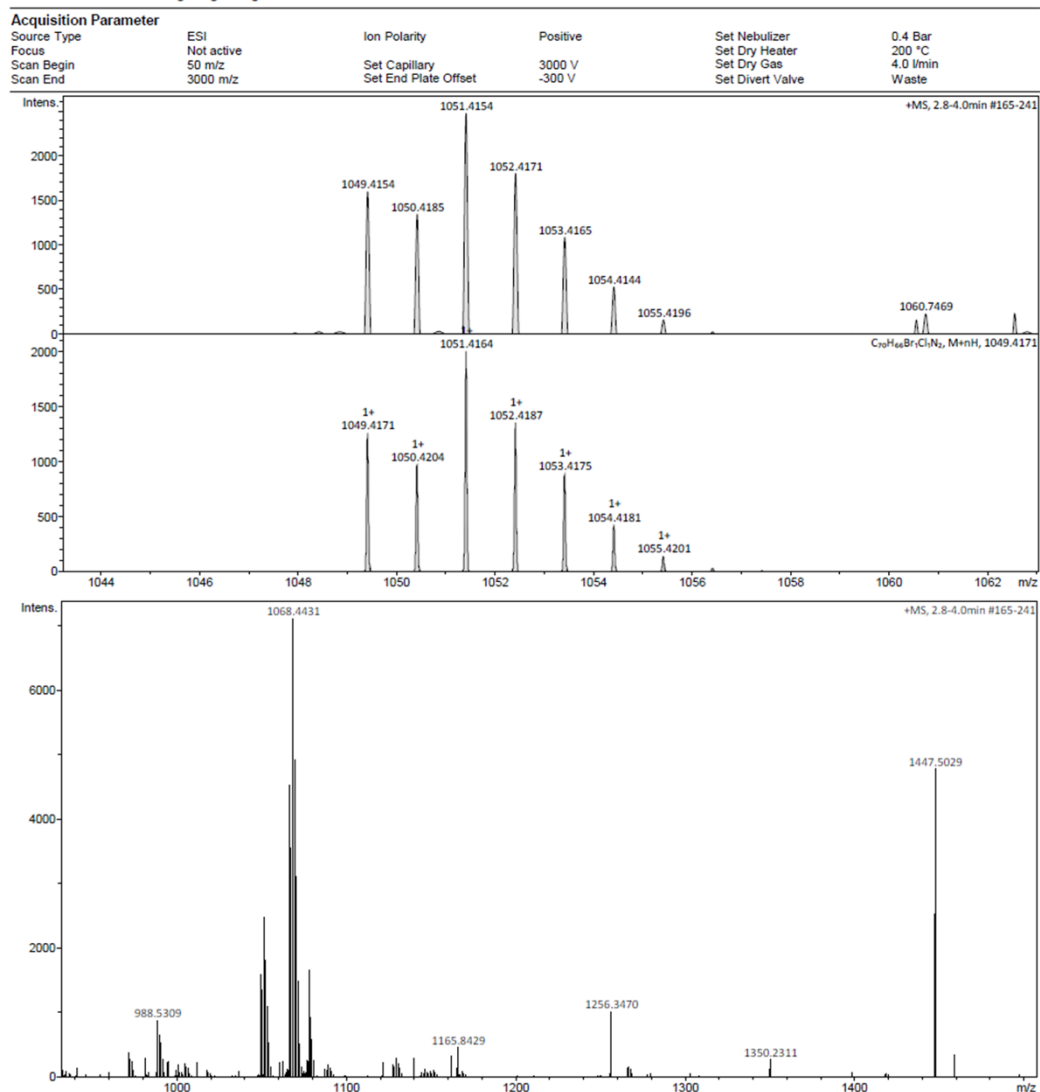

Figure S15. HRMS spectrum of **3**.

### 3,5-bis(2,7-bis(4-(*tert*-butyl)phenyl)-9*H*-carbazol-9-yl)-4-chloro-*N,N*-di-*p*-tolylaniline (**4**)

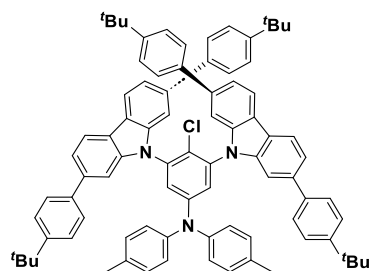

Compound **3** (700 mg, 0.666 mmol, 1.0 equiv.), di-*p*-tolylamine (145 mg, 0.733 mmol, 1.1 equiv.), Pd<sub>2</sub>(dba)<sub>3</sub> (18.3 mg, 0.020 mmol, 0.03 equiv.), tri-*tert*-butylphosphonium tetrafluoroborate (9.83 mg, 0.0533 mmol, 0.08 equiv.), NaO<sup>t</sup>Bu (192 mg, 2.00 mmol, 3 equiv.) and toluene (20 mL) were added to a 2-neck Schlenk tube. The mixture was stirred at 105 °C for 48 h under a nitrogen atmosphere. After cooling to room temperature, the reaction mixture reaction was quenched by adding water and extracted with 3× 50 mL dichloromethane. The organic phase was then separated and concentrated under reduced pressure. The crude product was purified by column chromatography on silica gel (dichloromethane: hexane= 1: 5) to afford compound **4** as a white solid. **Yield** 60%, 470 mg. **Mp**: decomposes at 364 °C. **R<sub>f</sub>**: 0.4 (dichloromethane: hexane= 1: 2). **<sup>1</sup>H NMR (500 MHz, CD<sub>2</sub>Cl<sub>2</sub>)** δ 8.17 (d, *J* = 8.1 Hz, 4H), 7.62 (d, *J* = 8.3 Hz, 8H), 7.55 (dd, *J* = 8.1, 1.2 Hz, 4H), 7.51 – 7.45 (m, 12H), 7.29 (s, 2H), 7.12 (d, *J* = 8.3 Hz, 4H), 6.86 (d, *J* = 8.2 Hz, 4H), 2.13 (s, 6H), 1.36 (s, 36H). **<sup>13</sup>C NMR (126 MHz, CD<sub>2</sub>Cl<sub>2</sub>)** δ 150.32, 148.88, 143.61, 141.68, 139.40, 138.84, 137.12, 134.71, 130.33, 127.06, 125.78, 125.57, 122.23, 121.54, 121.33, 120.51, 119.84, 108.76, 34.44, 31.15, 20.52. **HRMS (ESI-MS): [C<sub>84</sub>H<sub>80</sub>ClN<sub>3</sub> +H]<sup>+</sup> Calculated: 1166.6114; Found: 1166.6080.**

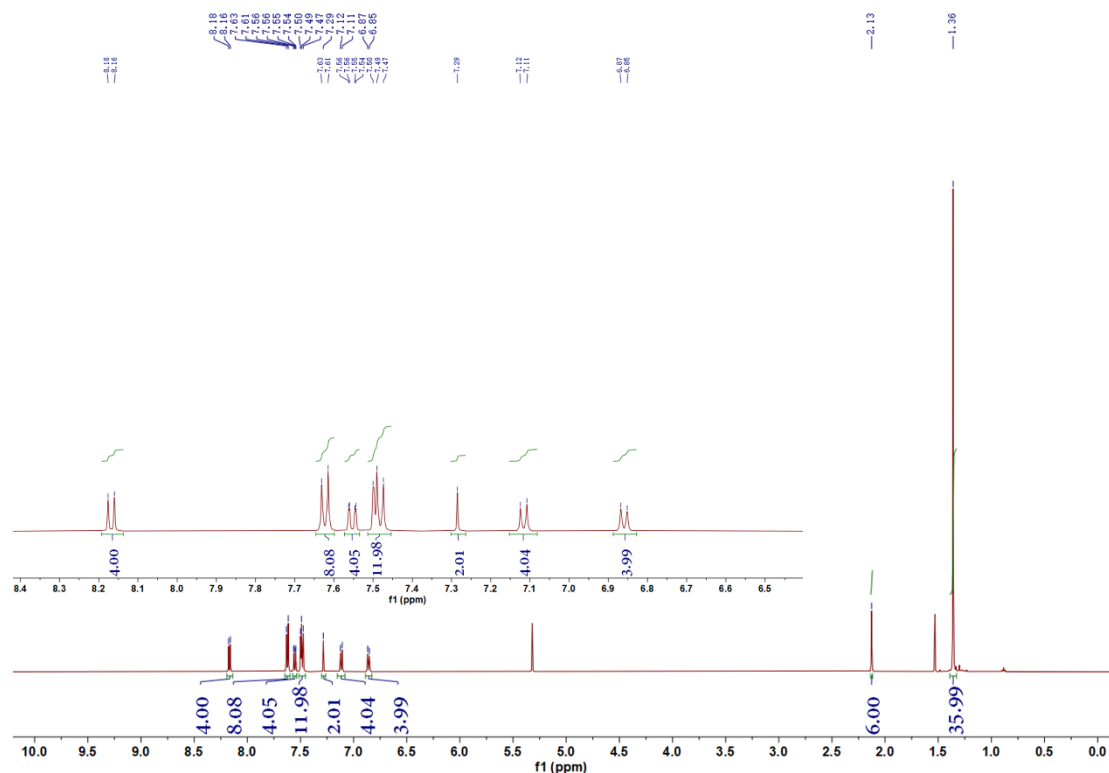

Figure S16. <sup>1</sup>H NMR spectrum of **4** in CD<sub>2</sub>Cl<sub>2</sub>.

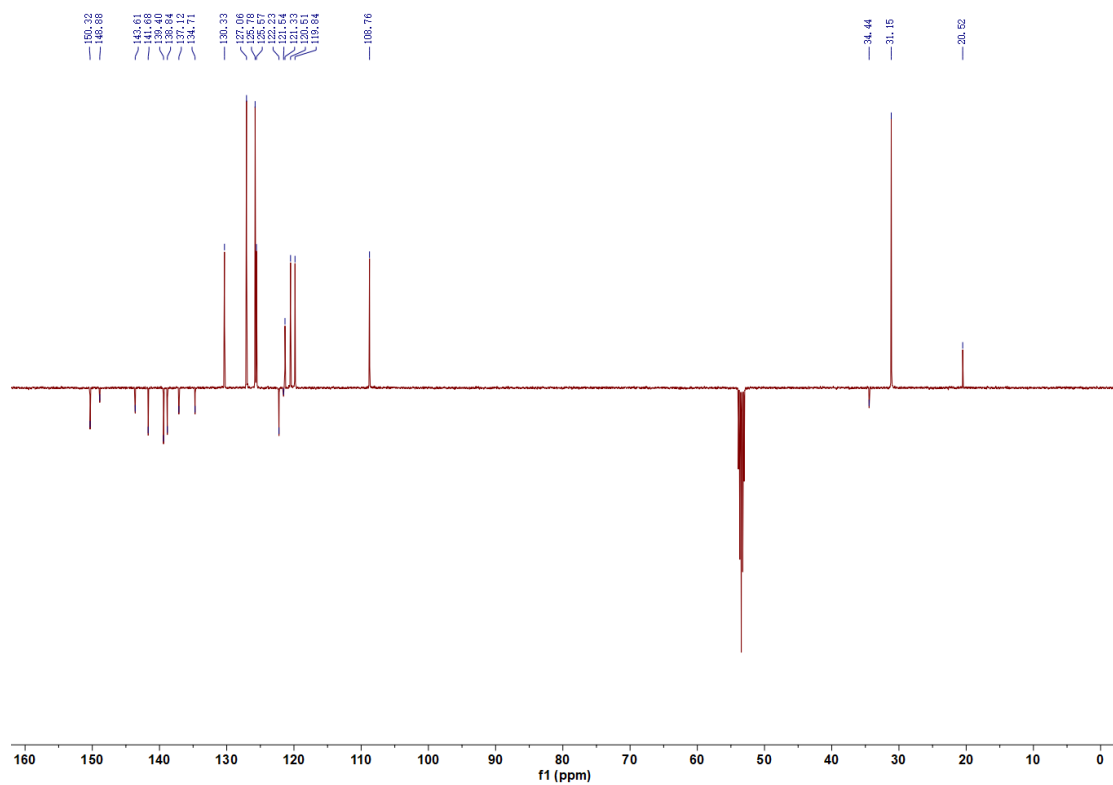

Figure S17. DEPTQ  $^{13}\text{C}$  NMR spectrum of **4** in  $\text{CD}_2\text{Cl}_2$ .



# Display Report

**Analysis Info**  
Analysis Name: D:\Data\Alans Data Oct 2021\STA\_Jingxiang Wang tBuDPA.d  
Method: 020216alanstune\_MED.m  
Sample Name: Jingxiang Wang tBuDPA  
Comment: Jingxiang Wang tBuDPA

Acquisition Date: 10/21/2021 2:17:49 PM  
Operator: Bruker UK  
Instrument: micrOTOF  
8213750.10408

**Acquisition Parameter**

|             |            |                      |          |                  |           |
|-------------|------------|----------------------|----------|------------------|-----------|
| Source Type | ESI        | Ion Polarity         | Positive | Set Nebulizer    | 0.4 Bar   |
| Focus       | Not active |                      |          | Set Dry Heater   | 250 °C    |
| Scan Begin  | 30 m/z     | Set Capillary        | 4000 V   | Set Dry Gas      | 6.0 l/min |
| Scan End    | 3000 m/z   | Set End Plate Offset | -500 V   | Set Divert Valve | Waste     |

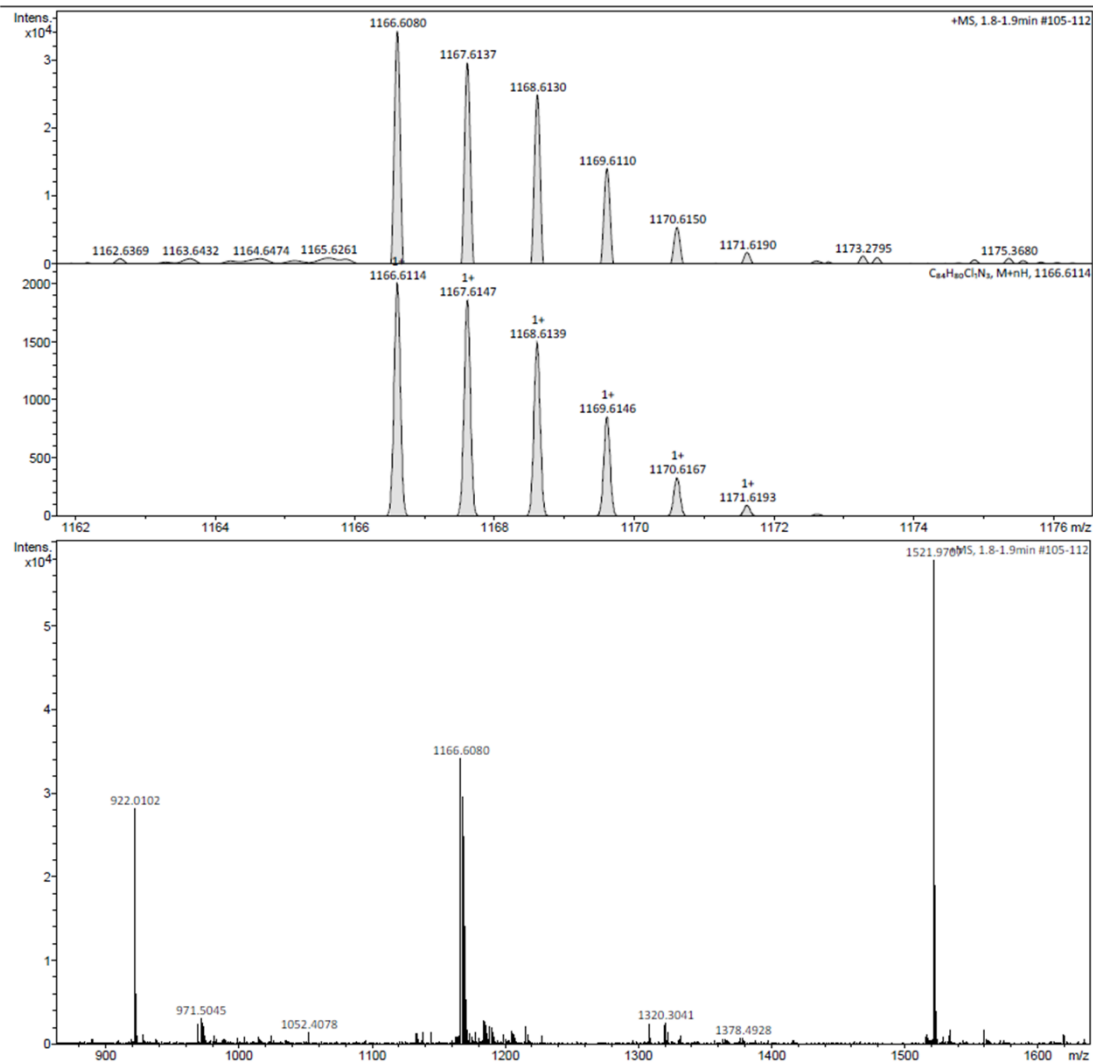

Figure S18. HRMS spectrum of 4.

## DPA-tBu-PhBN

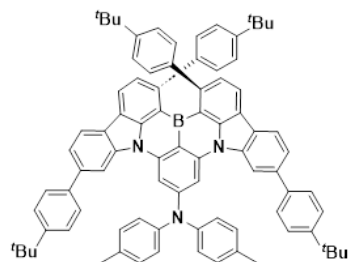

A solution of *t*-butyllithium in pentane (0.756 mL, 1.7 M, 1.29 mmol, 3 equiv.) was added slowly to a solution of **4** (0.500 g, 0.428 mmol, 1.0 equiv.) in *tert*-butylbenzene (12 mL) at -78 °C under a nitrogen atmosphere. Then the reaction was stirred at 60 °C for 6 h. After that, boron tribromide (0.527 mL, 5.57 mmol, 13 equiv.) was added slowly at -78 °C. The reaction mixture was then allowed to warm to room temperature and stirred for 24 h. *N,N*-diisopropylethylamine (0.448 mL, 2.57 mmol, 6 equiv.) was then added at 0 °C. After stirring under reflux for 5 days, the reaction mixture was quenched by adding water and extracted with 3× 50 mL dichloromethane. The organic phase was then separated and concentrated under reduced pressure. The crude product was purified by column chromatography on silica gel (chloroform: hexane = 1: 6) and washed with DCM to afford **DPA-tBuPh-BN** as a yellow powder. **Yield** 11%, 52 mg. **Mp**: 343-344 °C. **R<sub>f</sub>**: 0.4 (chloroform: hexane = 1: 2). **<sup>1</sup>H NMR (500 MHz, CD<sub>2</sub>Cl<sub>2</sub>)** δ 8.22 (d, *J* = 8.0 Hz, 2H), 8.17 – 8.08 (m, 4H), 7.99 (s, 2H), 7.62 (d, *J* = 7.9 Hz, 2H), 7.53 (d, *J* = 8.1 Hz, 4H), 7.42 (d, *J* = 8.1 Hz, 4H), 7.36 (d, *J* = 8.0 Hz, 4H), 7.29 (d, *J* = 7.8 Hz, 2H), 7.22 (d, *J* = 7.9 Hz, 4H), 6.86 (d, *J* = 6.2 Hz, 4H), 6.69 (d, *J* = 8.0 Hz, 4H), 2.25 (s, 6H), 1.44 (s, 18H), 1.28 (s, 18H). **<sup>13</sup>C NMR (126 MHz, CD<sub>2</sub>Cl<sub>2</sub>)** δ 152.70, 150.29, 149.86, 146.69, 144.36, 143.47, 142.27, 140.22, 139.44, 138.49, 137.49, 134.75, 131.21, 130.42, 127.01, 126.57, 125.99, 125.86, 123.94, 123.05, 121.84, 121.48, 121.25, 120.86, 120.64, 112.25, 99.73, 34.50, 34.18, 31.20, 31.03, 21.04. **HRMS (MALDI-MS):** [C<sub>84</sub>H<sub>78</sub>BN<sub>3</sub>]<sup>+</sup> **Calculated:**1139.6283; **Found:** 1139.6252. **Anal. Calcd. For C<sub>84</sub>H<sub>78</sub>BN<sub>3</sub>:** C 88.47%, H 6.89%, N 3.68% **Found:** C 88.36%, H 6.87%, N 3.43%. **HPLC** (80% Tetrahydrofuran and 20% Water): 97.98% pure, retention time 11.039 min.

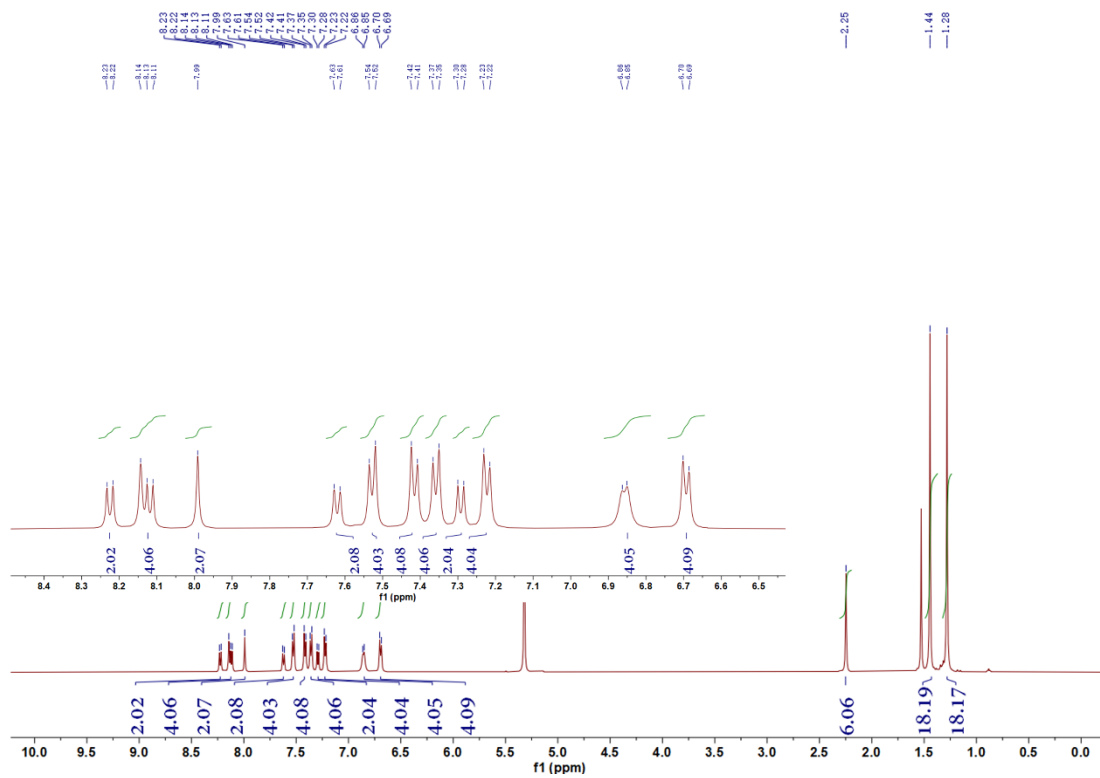

Figure S19.  $^1\text{H}$  NMR spectrum of **DPA-tBuPh-BN** in  $\text{CD}_2\text{Cl}_2$ .

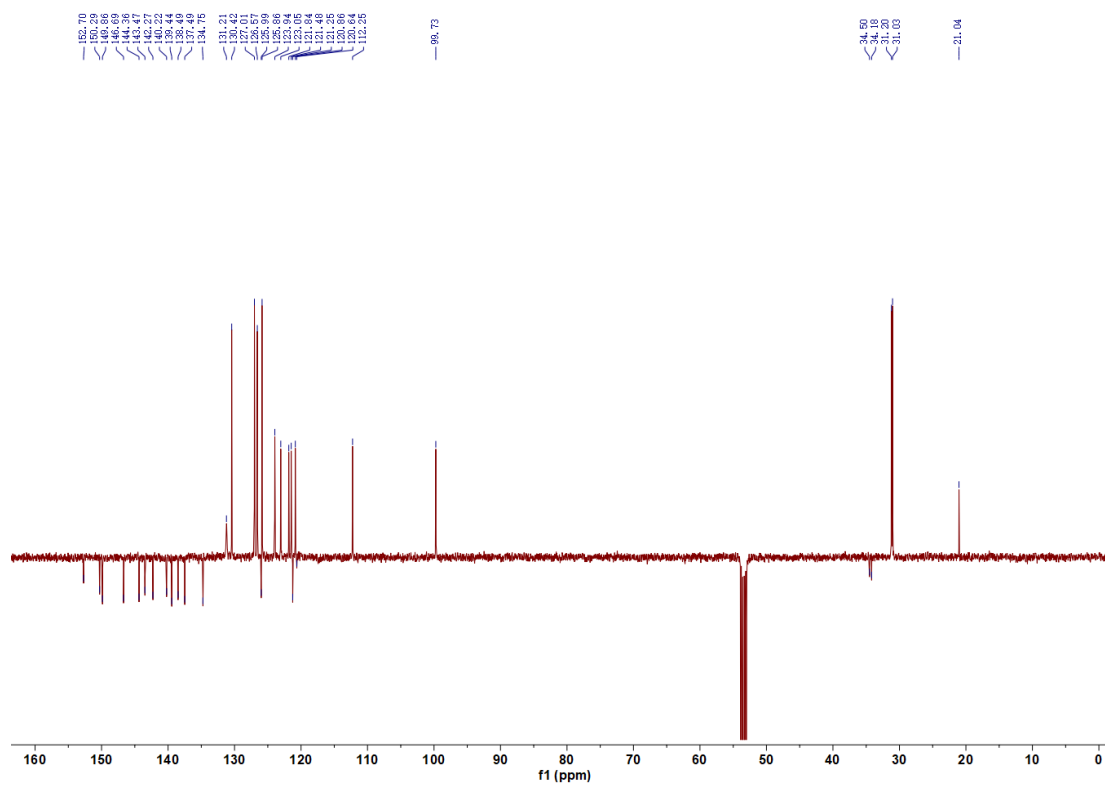

Figure S20. DEPTQ  $^{13}\text{C}$  NMR spectrum of **DPA-tBuPh-BN** in  $\text{CD}_2\text{Cl}_2$ .

Generic Display Report (all)

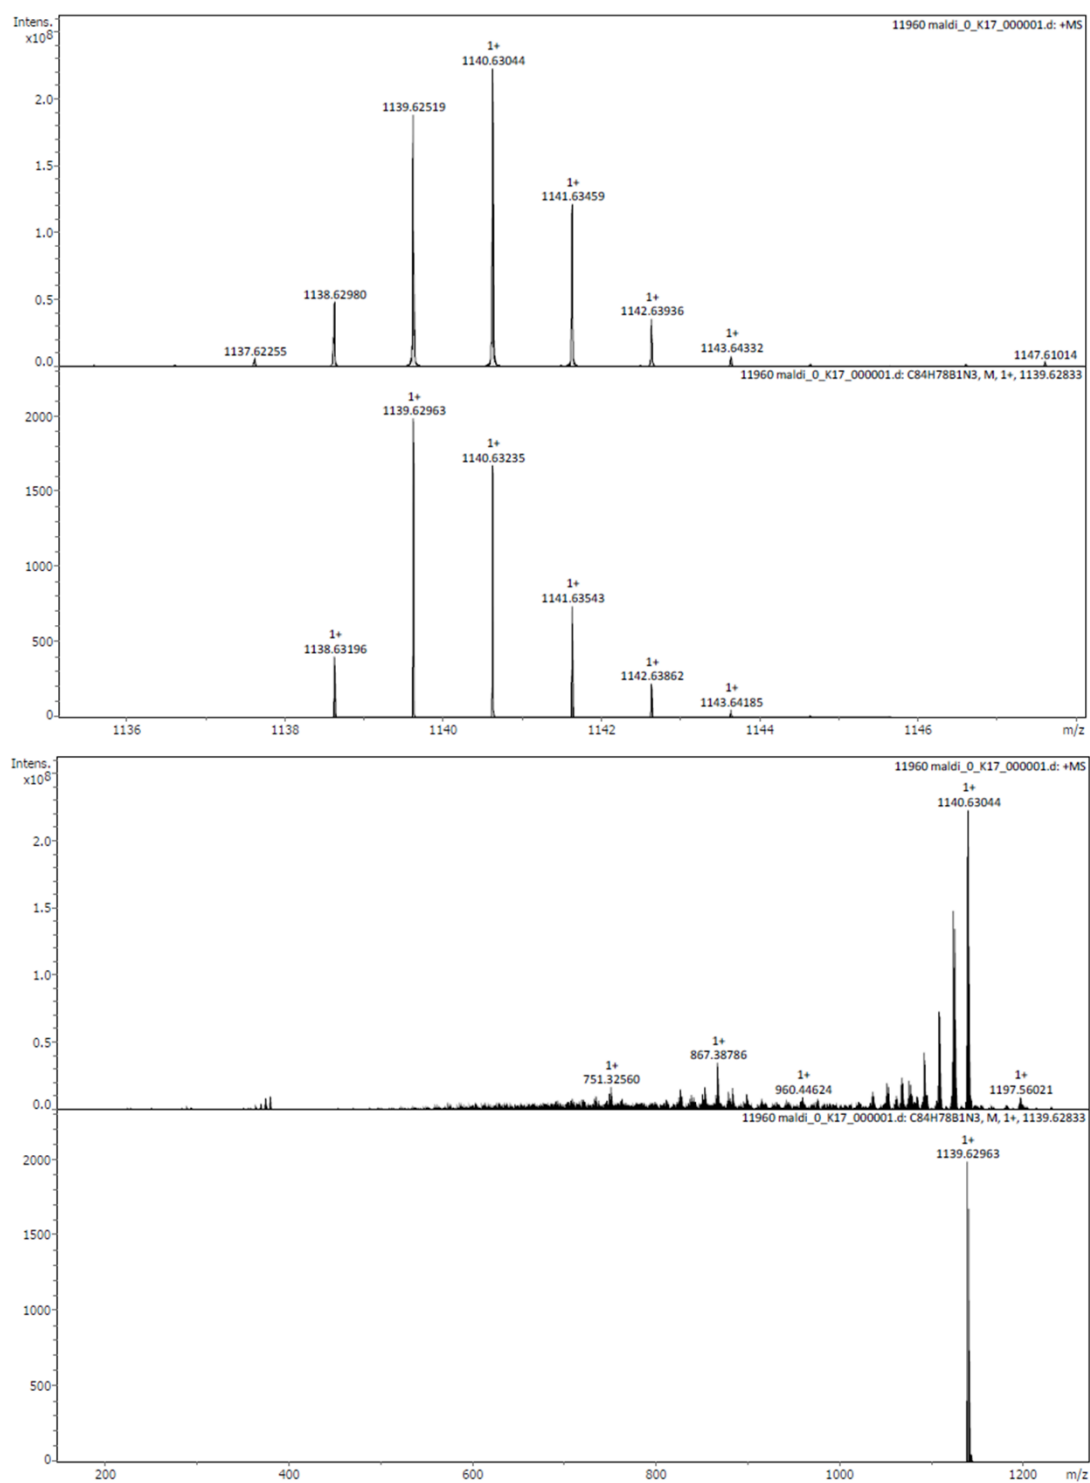

Figure S21. HRMS spectrum of DPA-tBuPh-BN.

### Elemental Analysis Sample Results

**Name** Jingxiang Wang  
**Organisation Name** University of St Andrews  
**Purchase order number**

| Standard – Acetanilide |                  |       |
|------------------------|------------------|-------|
| Element                | Expected %       | Found |
| Carbon                 | 71.10 (+/- 0.23) | 71.02 |
| Hydrogen               | 6.71 (+/- 0.07)  | 6.64  |
| Nitrogen               | 10.34 (+/- 0.09) | 10.29 |

| Analysis – DPA-tBuPh-BN |            |           |           |
|-------------------------|------------|-----------|-----------|
| Element                 | Expected % | Found (1) | Found (2) |
| Carbon                  | 88.47      | 88.47     | 88.25     |
| Hydrogen                | 6.89       | 6.78      | 6.96      |
| Nitrogen                | 3.68       | 3.47      | 3.39      |

|                       |               |
|-----------------------|---------------|
| <b>Date completed</b> | 16.04.2024    |
| <b>Signature</b>      | O. McCullough |
| <b>Comments</b>       |               |

Figure S22. Elemental analysis data of **DPA-tBuPh-BN**.

# HPLC Trace Report02Aug2023

## <Sample Information>

Sample Name : dpatbuphbn  
Sample ID :  
Method Filename : 80% THF 20% water 0.6 mlmin 20 mins.lcm  
Batch Filename : 01082023.lcb  
Vial # : 2-9  
Injection Volume : 5 uL  
Date Acquired : 01/08/2023 18:33:52  
Date Processed : 01/08/2023 18:53:55  
Sample Type : Unknown  
Acquired by : System Administrator  
Processed by : System Administrator

## <Chromatogram>

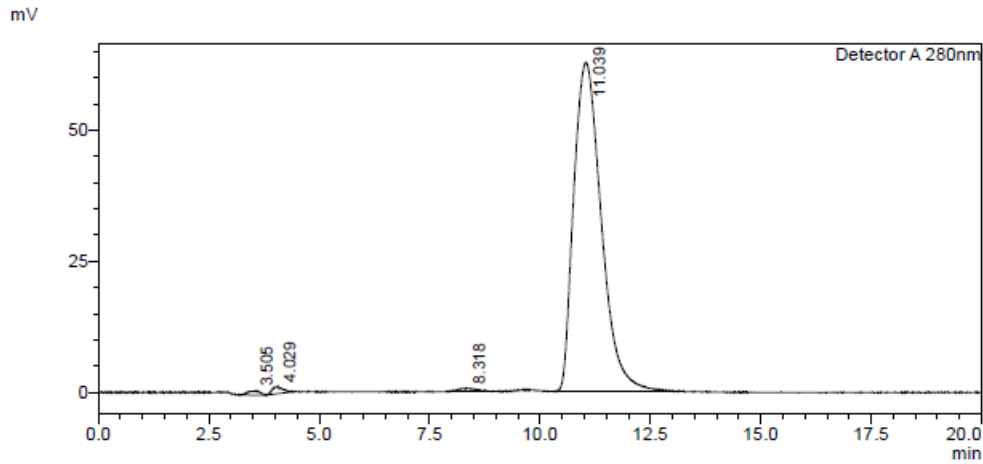

## <Peak Table>

Detector A 280nm

| Peak# | Ret. Time | Area    | Height | Area%   | Area/Height | Width at 5% Height |
|-------|-----------|---------|--------|---------|-------------|--------------------|
| 1     | 3.505     | 15630   | 773    | 0.564   | 20.224      | 0.532              |
| 2     | 4.029     | 23445   | 1310   | 0.847   | 17.895      | 0.567              |
| 3     | 8.318     | 16841   | 546    | 0.608   | 30.819      | 0.915              |
| 4     | 11.039    | 2712929 | 62662  | 97.981  | 43.295      | 1.426              |
| Total |           | 2768845 | 65291  | 100.000 |             |                    |

Figure S23. HPLC spectrum of DPA-tBuPh-BN.

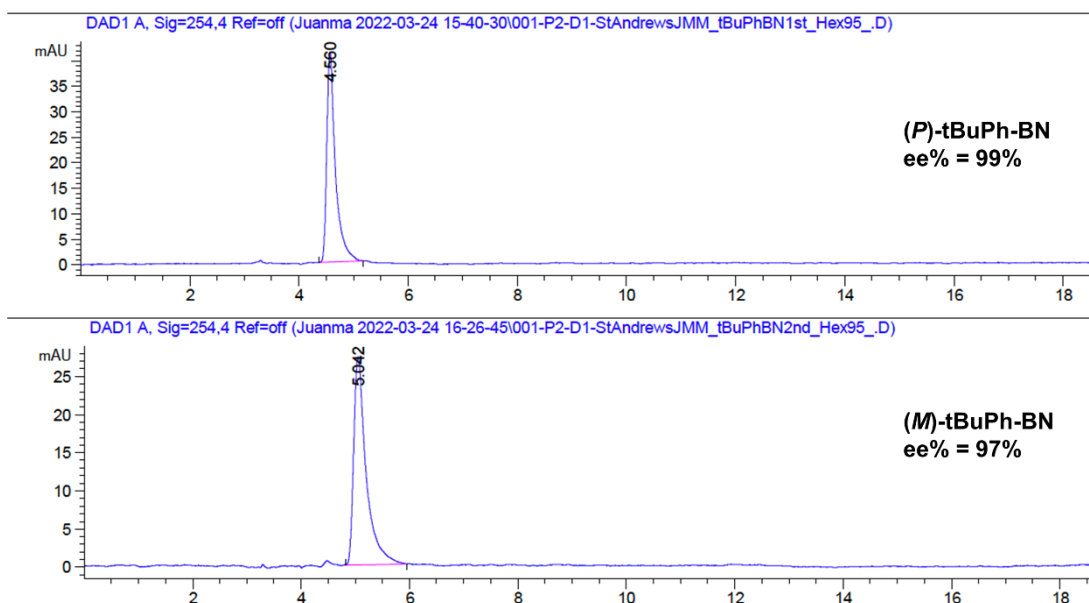

Figure S24. Chiral HPLC spectra of (*P*)-tBuPh-BN and (*M*)-tBuPh-BN (Column: CHIRALPAK IE; Solvent system: Hexane:THF 95:5; Detector: 254 nm).

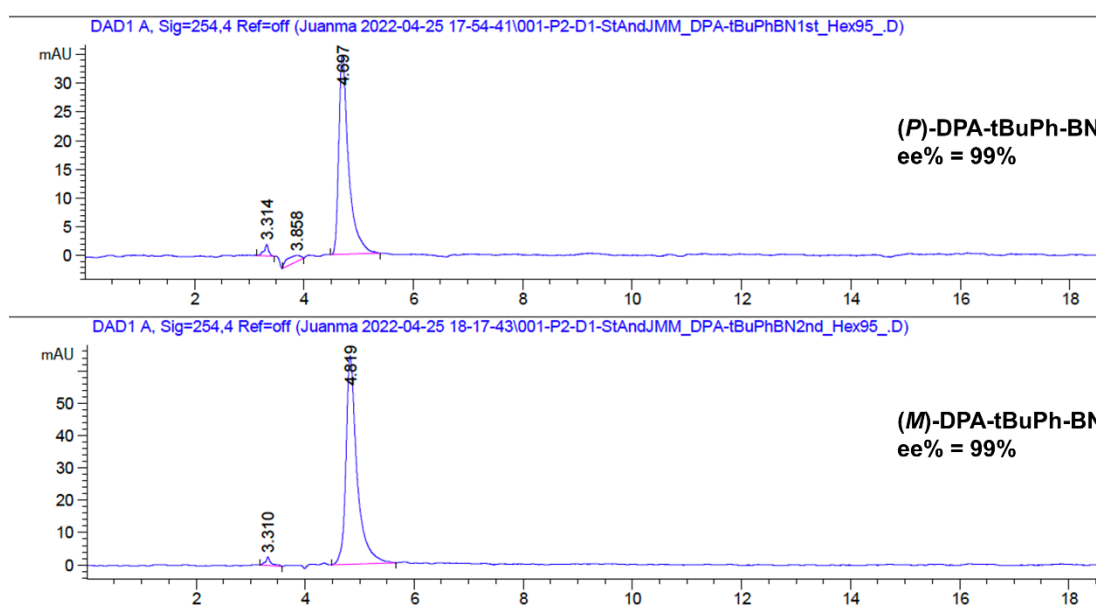

Figure S25. Chiral HPLC spectra of (*P*)-DPA-tBuPh-BN and (*M*)-DPA-tBuPh-BN (Column: CHIRALPAK IE; Solvent system: Hexane:THF 95:5; Detector: 254 nm).

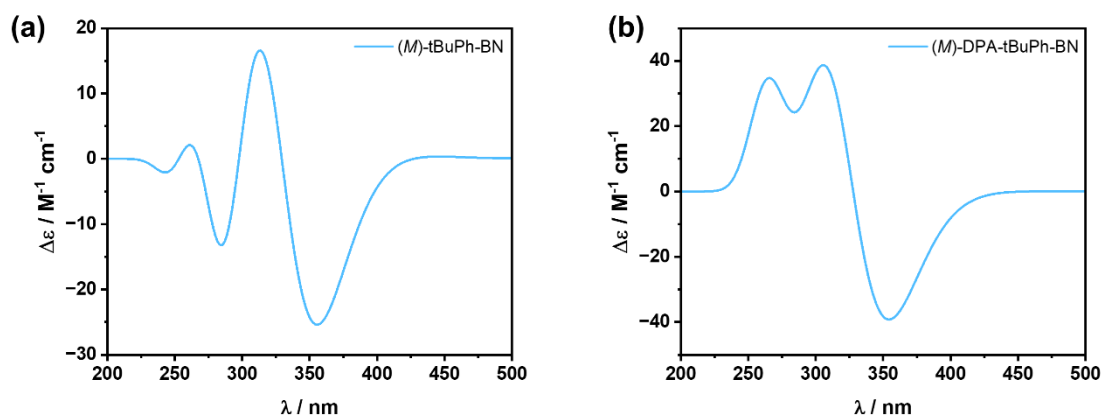

Figure S26. Theoretically simulated CD spectra of (*M*)-tBuPh-BN and (*M*)-DPA-tBuPh-BN calculated at the TDA-DFT/M062X/6-31G(d,p) in toluene.

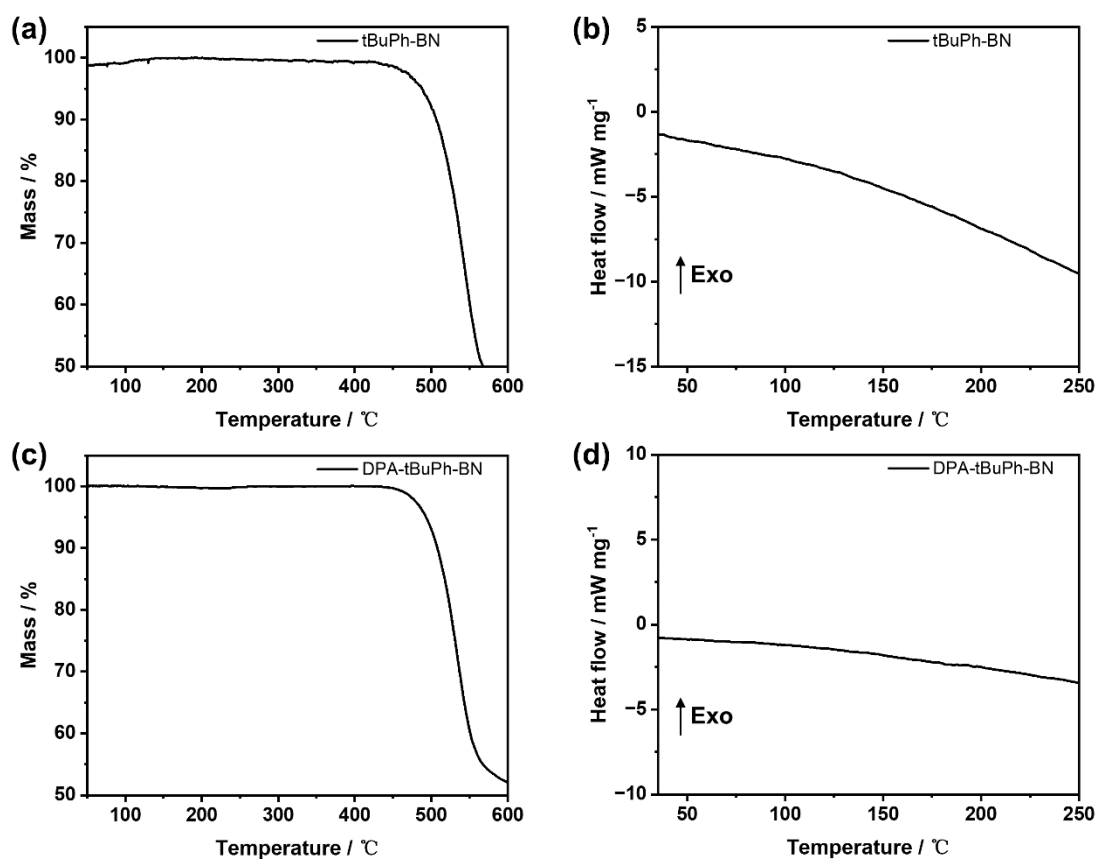

Figure S27. (a) TGA and (b) DSC analyses of tBuPh-BN and (c) TGA and (d) DSC analyses of DPA-tBuPh-BN.



## X-ray Crystallography

X-ray diffraction data for compound **tBuPh-BN** were collected using a Rigaku FR-X Ultrahigh Brilliance Microfocus RA generator/confocal optics with XtaLAB P200 diffractometer [Mo K $\alpha$  radiation ( $\lambda = 0.71073 \text{ \AA}$ )]. Diffraction data for compound **DPA-tBuPh-BN** were collected using a Rigaku MM-007HF High Brilliance RA generator/confocal optics [Cu K $\alpha$  radiation ( $\lambda = 1.54187 \text{ \AA}$ )] with XtaLAB P200 diffractometer. Data for both compounds were collected at 173 K using either CrystalClear<sup>26</sup> (using  $\omega$  steps and accumulating area detector images spanning at least a hemisphere of reciprocal space) or CrysAlisPro<sup>27</sup> (using a calculated strategy), and processed (including correction for Lorentz, polarization and absorption) using CrysAlisPro. Structures were solved by dual-space methods (SHELXT<sup>28</sup>) and refined by full-matrix least-squares against  $F^2$  (SHELXL-2019/3<sup>29</sup>). Non-hydrogen atoms were refined anisotropically (except as specified below), and hydrogen atoms were refined using a riding model except for the solvent OH hydrogens in **DPA-tBuPh-BN** which were located from the difference Fourier map and refined isotropically with a distance restraint, and with thermal motion riding on that of the parent atom. The structure of **tBuPh-BN** showed high proportions of void space ( $771 \text{ \AA}^3$ ) and the SQUEEZE<sup>30</sup> routine implemented in PLATON<sup>31</sup> was used to remove the contribution to the diffraction pattern of the unordered electron density in the void spaces. The structure of **DPA-tBuPh-BN** showed rotational disorder in the orientation of one *t*Bu group which was modelled over two sites with restraints to bond distances and thermal motion. Atoms in the minor component of the disorder were refined isotropically. The structure also showed disorder in the orientation of the MeOH solvent molecule, which was also modelled over two sites with restraints to bond distances. The structure model of this compound showed it in the non-centrosymmetric space group  $P2_12_12_1$ , with a refined Flack parameter of 0.04(5), indicative of a majority of a single enantiomer, in this case the *M*-enantiomer. All calculations except SQUEEZE were performed using the Olex2<sup>32</sup> interface.

Selected crystallographic data are presented in Table S1. CCDC 2356677 and 2356678 contains the supplementary crystallographic data for this paper. These data can be obtained free of charge from The Cambridge Crystallographic Data Centre via [www.ccdc.cam.ac.uk/structures](http://www.ccdc.cam.ac.uk/structures).

Table S1. Selected crystallographic data.

|                                                            | <b>tBuPh-BN</b>                                 | <b>DPA-tBuPh-BN</b>                                            |
|------------------------------------------------------------|-------------------------------------------------|----------------------------------------------------------------|
| formula                                                    | C <sub>70</sub> H <sub>65</sub> BN <sub>2</sub> | C <sub>89</sub> H <sub>90</sub> BN <sub>3</sub> O <sub>2</sub> |
| fw                                                         | 945.05                                          | 1244.44                                                        |
| crystal description                                        | yellow prism                                    | yellow prism                                                   |
| crystal size [mm <sup>3</sup> ]                            | 0.20×0.10×0.07                                  | 0.25×0.12×0.03                                                 |
| space group                                                | <i>P</i> $\bar{1}$                              | <i>P</i> 2 <sub>1</sub> 2 <sub>1</sub>                         |
| Flack parameter                                            | -                                               | 0.04(5)                                                        |
| <i>a</i> [Å]                                               | 13.4271(5)                                      | 10.53694(4)                                                    |
| <i>b</i> [Å]                                               | 13.9487(4)                                      | 20.05694(9)                                                    |
| <i>c</i> [Å]                                               | 19.3551(8)                                      | 33.47918(14)                                                   |
| $\alpha$ [°]                                               | 102.551(3)                                      |                                                                |
| $\beta$ [°]                                                | 105.385(4)                                      |                                                                |
| $\gamma$ [°]                                               | 106.129(3)                                      |                                                                |
| vol [Å <sup>3</sup> ]                                      | 3187.5(2)                                       | 7075.45(5)                                                     |
| <i>Z</i>                                                   | 2                                               | 4                                                              |
| $\rho$ (calc) [g/cm <sup>3</sup> ]                         | 0.985                                           | 1.168                                                          |
| $\mu$ [mm <sup>-1</sup> ]                                  | 0.056                                           | 0.522                                                          |
| F(000)                                                     | 1008.0                                          | 2664                                                           |
| reflections collected                                      | 61542                                           | 85843                                                          |
| independent reflections ( <i>R</i> <sub>int</sub> )        | 15033 (0.0498)                                  | 14502 (0.0206)                                                 |
| parameters, restraints                                     | 670, 0                                          | 913, 87                                                        |
| GooF on <i>F</i> <sup>2</sup>                              | 1.027                                           | 1.043                                                          |
| <i>R</i> <sub><i>I</i></sub> [ <i>I</i> > 2σ( <i>I</i> )]s | 0.0983                                          | 0.0371                                                         |
| <i>wR</i> <sub>2</sub> (all data)                          | 0.3208                                          | 0.1038                                                         |
| largest diff. peak/hole [e/Å <sup>3</sup> ]                | 0.49/-0.24                                      | 0.284, -0.233                                                  |

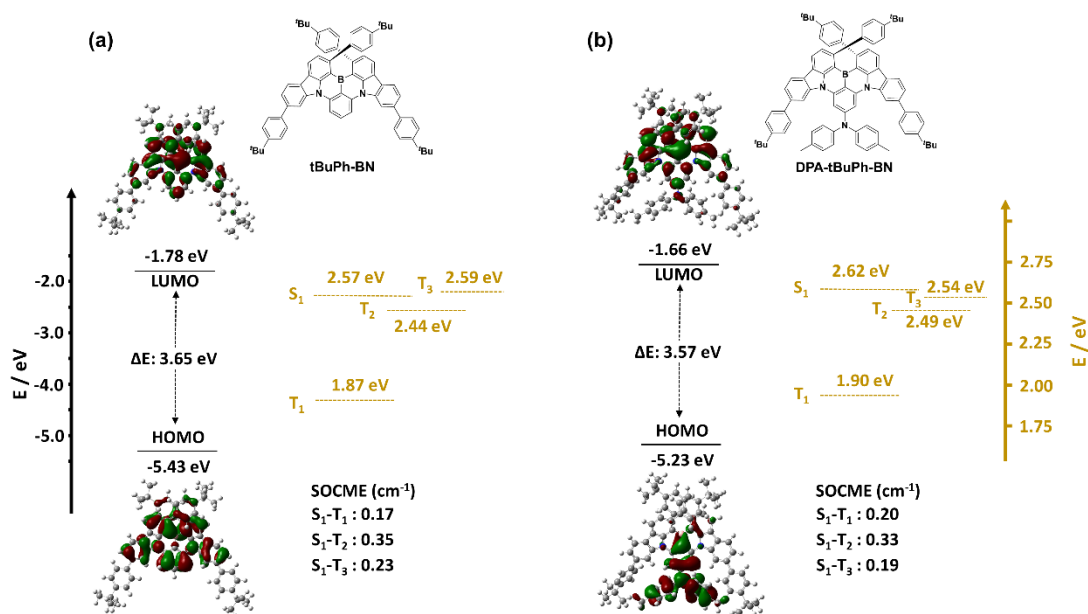

Figure S28. Calculated electron density distribution (isovalue: 0.02) of the HOMO, LUMO and energy levels in the gas phase based on optimized ground-state geometries and SOCME based on optimized  $T_1$  geometries at the PBE0/6-31G(d,p) level.

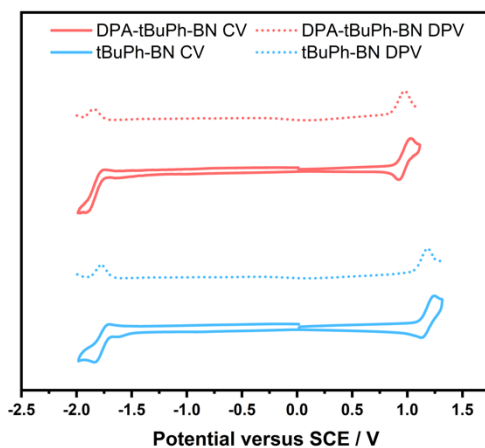

Figure S29. CV and DPV of **tBuPh-BN** and **DPA-tBuPh-BN** in degassed DCM with 0.1 M  $[^n\text{Bu}_4\text{N}]\text{PF}_6$  as the supporting electrolyte and  $\text{Fc}/\text{Fc}^+$  as the internal reference versus SCE (0.46 V vs. SCE)<sup>19</sup>. CV was performed at a sweep rate of 100 mV/s. DPV was conducted with an increment potential of 0.01 V and a pulse amplitude, width, and period of 50 mV, 0.06, and 0.5 s, respectively.

Table S2. Electrochemical data of **tBuPh-BN** and **DPA-tBuPh-BN**.<sup>a</sup>

|              | $E_{\text{ox}} / \text{V}$ | $E_{\text{red}} / \text{V}$ | HOMO/ eV | LUMO/ eV | $\Delta E / \text{eV}$ |
|--------------|----------------------------|-----------------------------|----------|----------|------------------------|
| tBuPh-BN     | 0.73                       | -2.23                       | -5.53    | -2.57    | 2.96                   |
| DPA-tBuPh-BN | 0.51                       | -2.31                       | -5.31    | -2.49    | 2.82                   |

<sup>a</sup> In degassed DCM with 0.1 M [<sup>n</sup>Bu<sub>4</sub>N]PF<sub>6</sub> as the supporting electrolyte and Fc/Fc<sup>+</sup> as the internal reference (0.46 V vs. SCE)<sup>19</sup>. The HOMO and LUMO energies were determined using the relation HOMO/LUMO =  $-(E_{\text{ox}} / E_{\text{red}} + 4.8)$  eV,<sup>21</sup> where  $E_{\text{ox}}$  and  $E_{\text{red}}$  are the peak of anodic and cathodic potentials from DPV relative to Fc/Fc<sup>+</sup>.  $\Delta E$  is the energy gap between HOMO and LUMO.

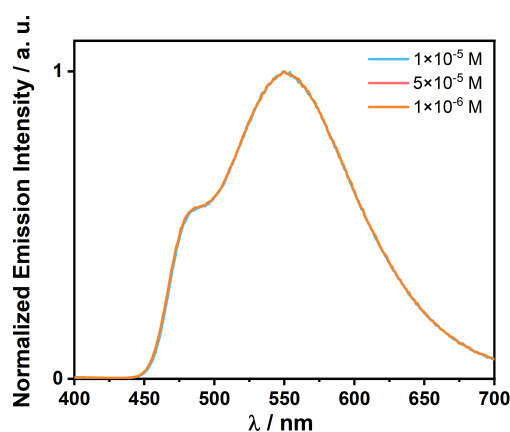

Figure S30. PL spectra of **DPA-tBuPh-BN** in acetone at different concentrations at 300 K. ( $\lambda_{\text{exc}} = 340$  nm).

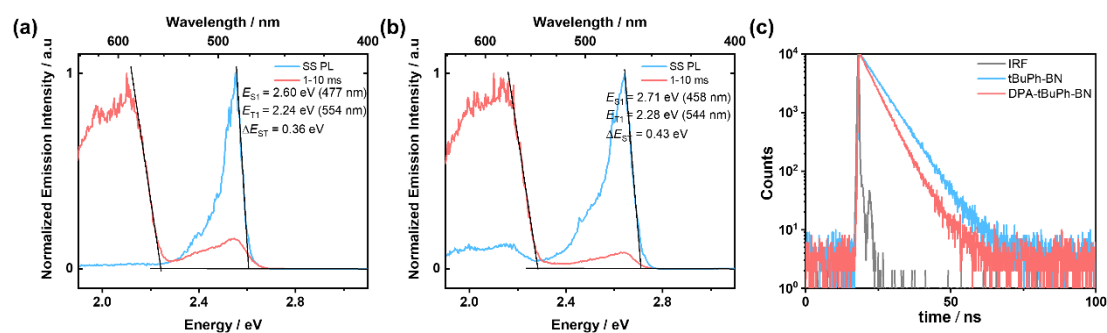

Figure S31. Steady-state PL and phosphorescence spectra of (a) **tBuPh-BN** and (b) **DPA-tBuPh-BN** in 2-MeTHF at 77 K ( $\lambda_{\text{exc}} = 340$  nm). (c) Time-resolved PL decay of the prompt emission in degassed toluene ( $\lambda_{\text{exc}} = 375$  nm).

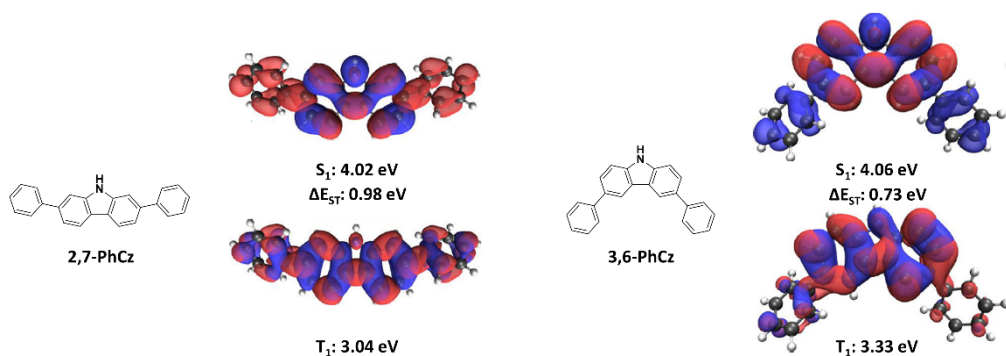

Figure S32. Density plot of the natural transition orbitals (NTOs) (hole (blue) & electron (red)) of the  $S_1$  and  $T_1$  states for **2,7-PhCz** and **3,6-PhCz**, plotted with isovalue: 0.02.

Table S3.  $\Phi_{PL}$  values of **tBuPh-BN** and **DPA-tBuPh-BN** in SF3-TRZ films ( $\lambda_{exc} = 420$  nm).

| $\Phi_{PL} (\lambda_{PL}) / \% (nm)$ | 1 wt% in<br>SF3-TRZ | 2 wt% in<br>SF3-TRZ | 4 wt% in<br>SF3-TRZ | 10 wt% in<br>SF3-TRZ |
|--------------------------------------|---------------------|---------------------|---------------------|----------------------|
| tBuPh-BN                             | 67 (490)            | 63 (496)            | 55 (495)            | 42 (496)             |
| DPA-tBuPh-BN                         | 47 (484)            | 46 (487)            | 36 (487)            | 30 (491)             |

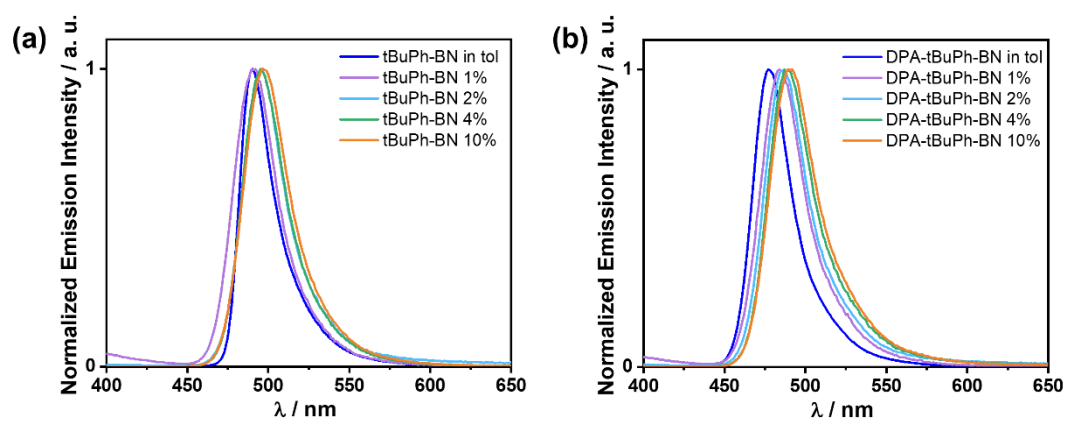

Figure S33. Steady-state PL spectra of (a) **tBuPh-BN** and (b) **DPA-tBuPh-BN** at 300 K in toluene and different doping concentration films in SF3-TRZ ( $\lambda_{exc} = 340$  nm).

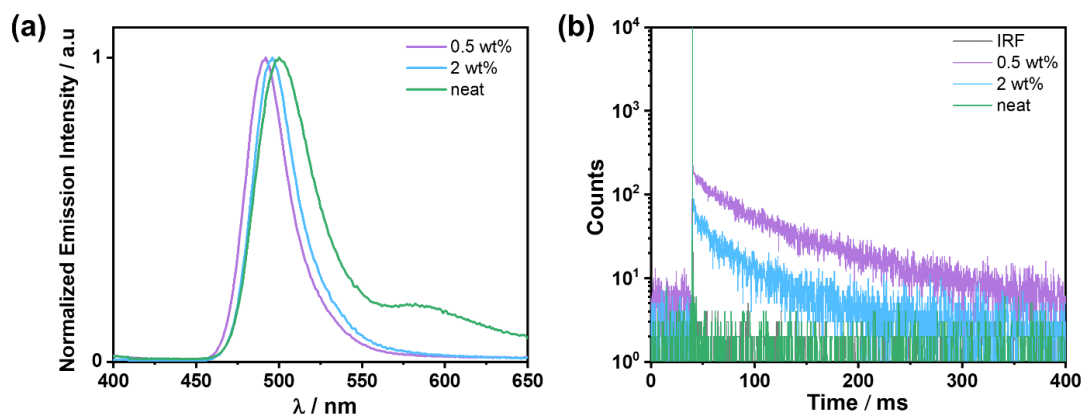

Figure S34. (a) Steady-state PL spectra and (b) time-resolved PL decay of the 0.5, 2 wt% doped films in SF3-TRZ and neat film of **tBuPh-BN** ( $\lambda_{\text{exc}} = 340$  nm).

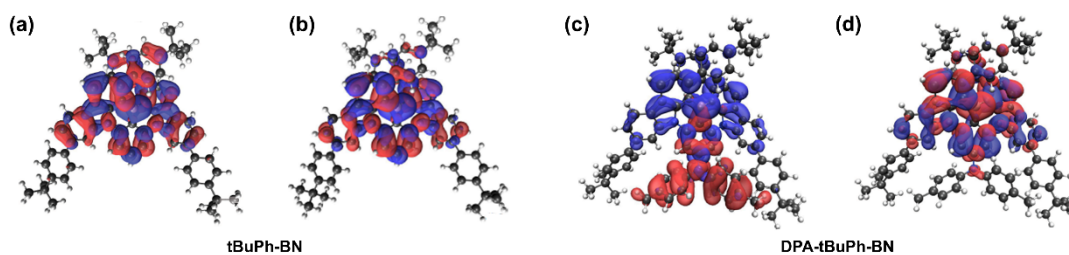

Figure S35. Density plot of the NTO hole (blue) & electron (red) of the  $S_1$  states for **tBuPh-BN** calculated at (a) PBE0, (b) M062X and **DPA-tBuPh-BN** calculated at (c) PBE0, (d) M062X, plotted with isovalue: 0.02.

Table S4. Summary of the calculated chiroptical properties of **tBuPh-BN** and **DPA-tBuPh-BN** at the optimized  $S_1$  geometry.

| $S_1 - S_0$                       | $ \mu  / 10^{-20}$<br>esu·cm | $ m  / 10^{-20}$<br>erg/Gauss | $\theta / ^\circ$ | $\cos \theta$ | $g_{\text{cal}}$       |
|-----------------------------------|------------------------------|-------------------------------|-------------------|---------------|------------------------|
| ( <i>M</i> )- <b>tBuPh-BN</b>     | 539                          | 1.22                          | 100               | -0.18         | $-1.6 \times 10^{-3}$  |
| ( <i>M</i> )- <b>DPA-tBuPh-BN</b> | 551                          | 0.726                         | 97                | -0.13         | $-0.67 \times 10^{-3}$ |

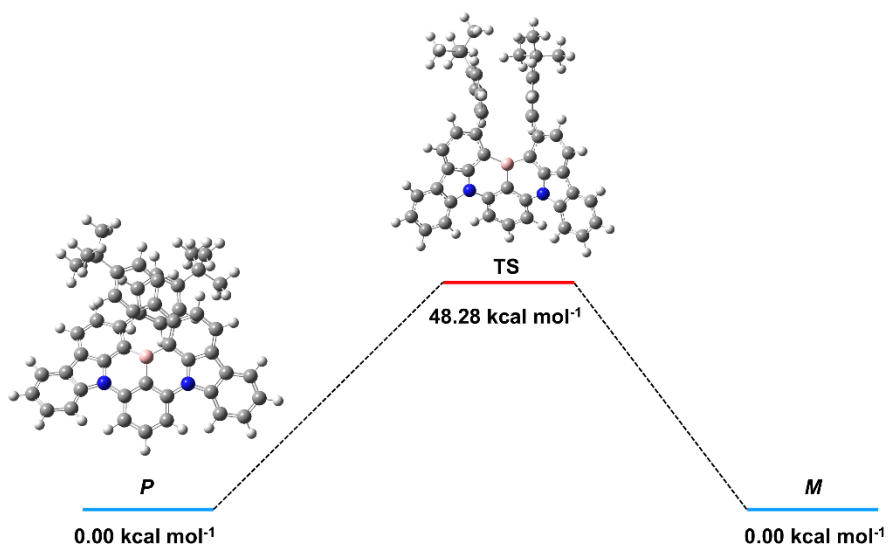

Figure S36. Calculated racemization energy barrier of the helicene moiety at the M062X/6-31G(d,p) level.

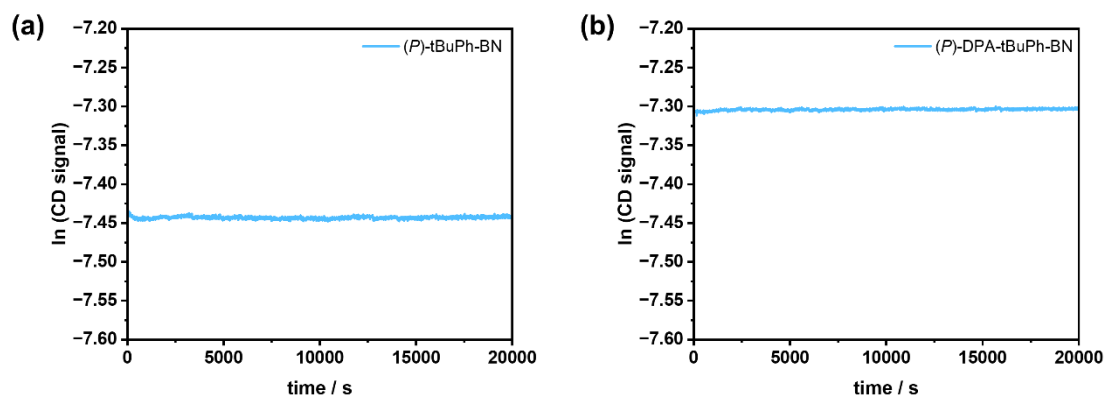

Figure S37. CD signal time evolution of (*P*)-tBuPh-BN and (*P*)-DPA-tBuPh-BN in toluene solutions measured at 330 nm and 90 °C for 20000 s.

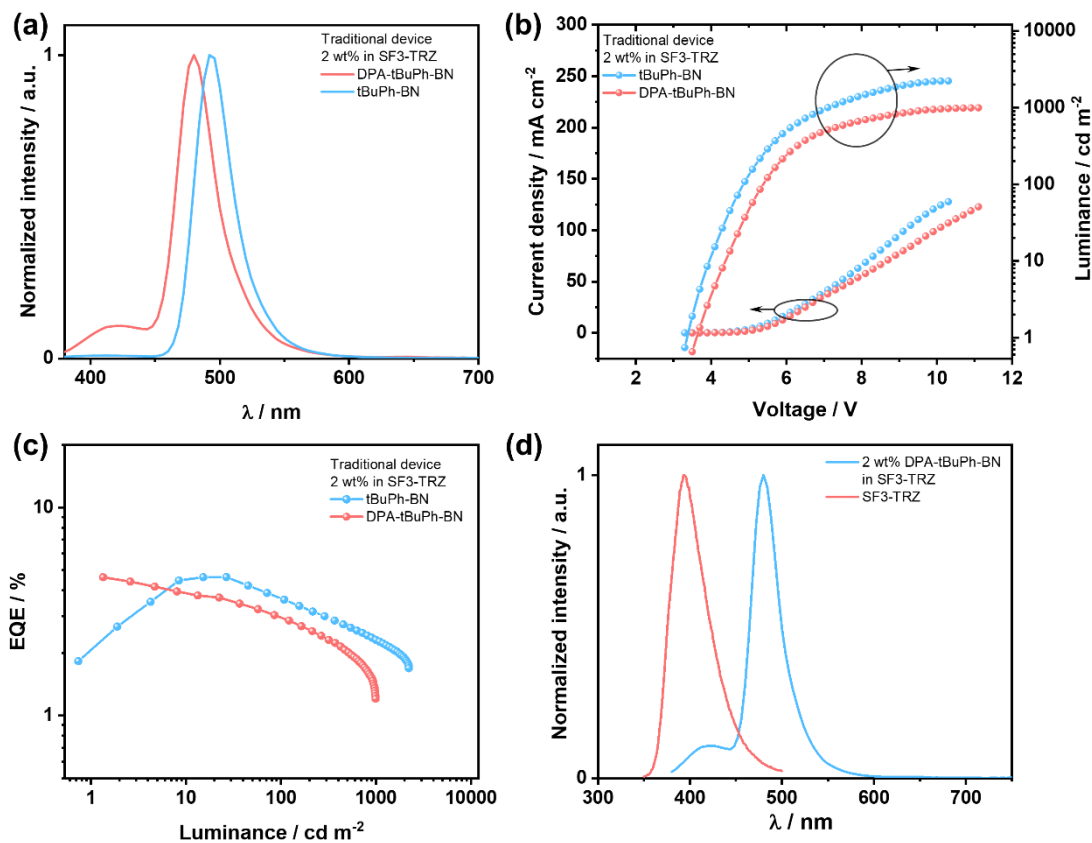

Figure S38. (a) EL spectra; (b) *JVL* characteristics; (c) EQE vs luminescence for the OLED with 2 wt% emitter doped in SF3-TRZ host in the EML; (d) A comparison of the PL spectra of SF3-TRZ in neat film and the 2 wt% emitter doped film in SF3-TRZ.

Table S5. Device data with an EML consisting of 2 wt% **tBuPh-BN** and **DPA-tBuPh-BN** in SF3-TRZ.

|              | $V_{\text{on}}$<br>/ V | $\lambda_{\text{EL}}$ (FWHM)<br>/ nm | $L_{\text{max}}$<br>/ cd m <sup>-2</sup> | $\text{EQE}_{\text{max}/100/1000}$<br>/ % | CIE (x, y) |
|--------------|------------------------|--------------------------------------|------------------------------------------|-------------------------------------------|------------|
| tBuPh-BN     | 3.4                    | 492 (33)                             | 2217                                     | 4.6/3.6/2.3                               | 0.10, 0.45 |
| DPA-tBuPh-BN | 3.6                    | 480 (35)                             | 990                                      | 4.6/2.9/-                                 | 0.12, 0.22 |



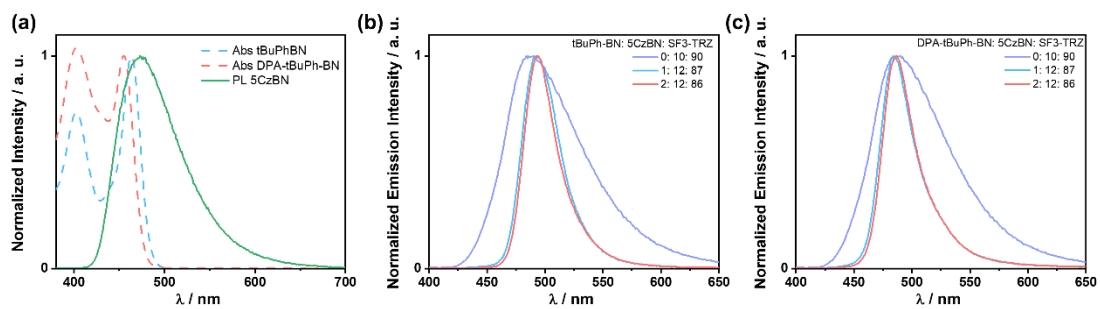

Figure S39. (a) UV/vis absorption spectra of **tBuPh-BN** and **DPA-tBuPh-BN** and PL spectrum of **5CzBN** in toluene ( $\lambda_{\text{exc}} = 340$  nm). PL spectra of different doping concentration films of (b) **tBuPh-BN** and (c) **DPA-tBuPh-BN** with **5CzBN** in SF3-TRZ host.

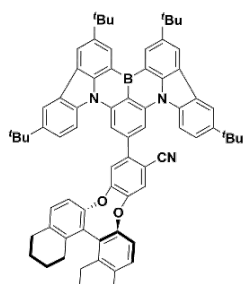

**OBN-2CN-BN**

*Adv. Mater.* **2021**, *33*, 2100652

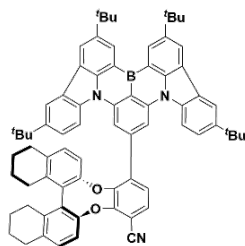

**OBN-4CN-BN**

**R-BN**

*Angew. Chem. Int. Ed.* **2021**, *60*, 20498  
*J. Am. Chem. Soc.* **2021**, *143*, 17958

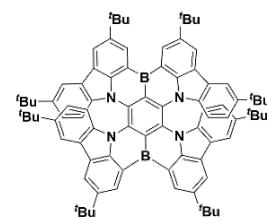

**R-TBN**

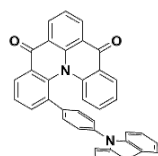

**QAO-PhCz**

*Chem. Commun.* **2021**, *57*, 11041

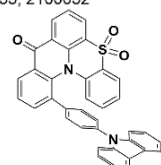

**QPO-PhCz**

*J. Mater. Chem. C* **2022**, *10*, 4393

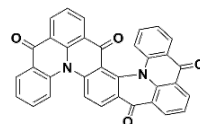

**Hel-DiDiKTa**

*J. Mater. Chem. C* **2022**, *10*, 4861

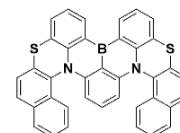

**Helicene-BN**

*CCS Chem.* **2022**, *4*, 3463

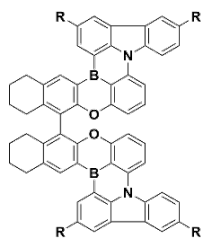

**R = H R-DOBN**  
**R = <sup>t</sup>Bu R-DOBNT**

*Adv. Mater.* **2022**, *34*, 2204253

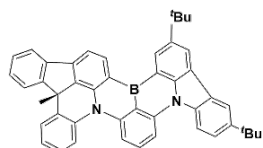

**BN-MelAc**

*Angew. Chem. Int. Ed.* **2022**, *61*, e202202227

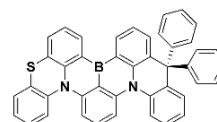

**BN4**

*Adv. Mater.* **2022**, *34*, 2105080

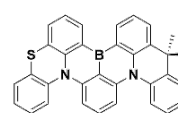

**BN5**

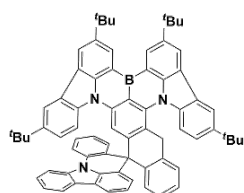

**Spiro-BNCz**

*Aggregate* **2023**, *5*, e445

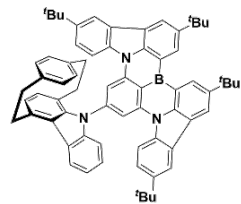

**Czp-<sup>t</sup>BuCzB**

*Angew. Chem. Int. Ed.* **2023**, *62*, e202217045

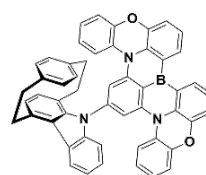

**Czp-POAB**

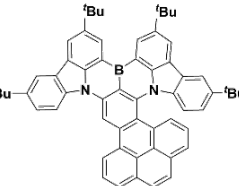

**BN-Py**

*Adv. Mater.* **2023**, *35*, 2305125

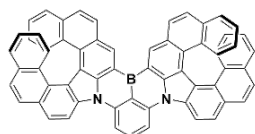

**3-C<sub>2</sub>**

*Angew. Chem. Int. Ed.* **2023**, *62*, e202218965

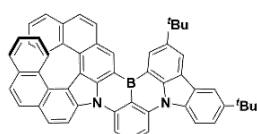

**4-C<sub>1</sub>**

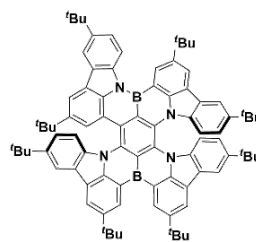

**RBNN**

*Adv. Mater.* **2024**, *36*, 2307420

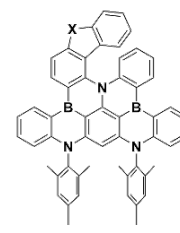

**X = O DB-O**  
**X = S DB-S**

*Adv. Mater.* **2024**, *36*, 2308314

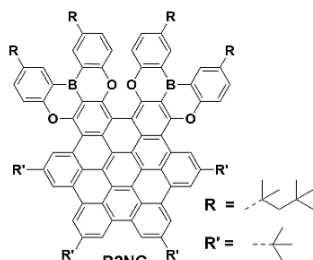

**B2NG**

*Chem. Eur. J.* **2024**, *30*, e202304169

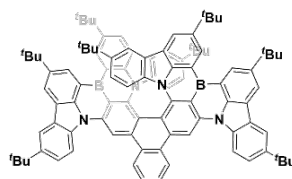

**BN[9]H**

*Angew. Chem. Int. Ed.* **2024**, e202401835

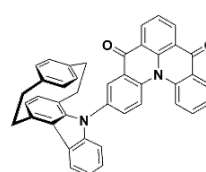

**PCP-DiKTa**

*Adv. Funct. Mater.* **2024**, 2402036

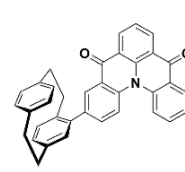

**Czp-DiKTa**

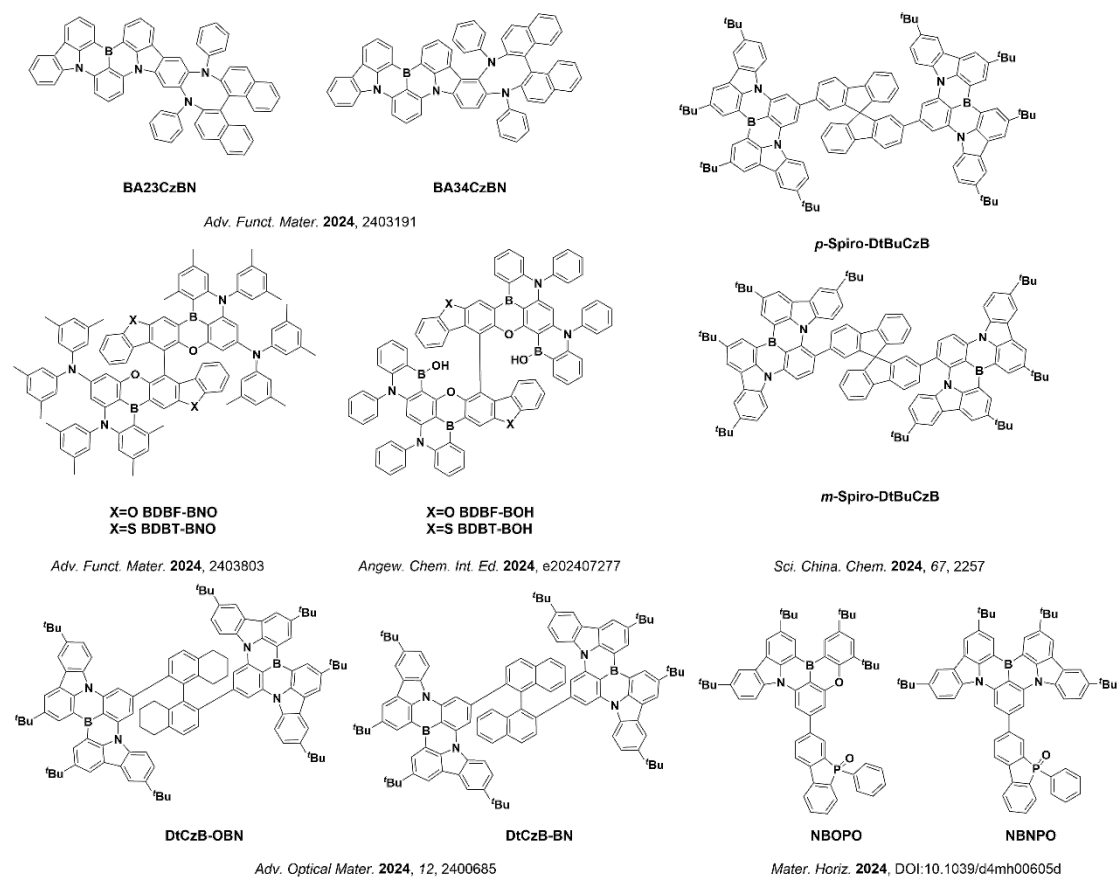

Figure S40. The structures of chiral MR-TADF emitters.

Table S6. Properties of chiral MR-TADF emitters and OLEDs.

| Emitters    | $\lambda_{\text{PL}}$<br>(FWHM)<br>/ nm | $\Phi_{\text{PL}}$<br>/ % | $ g_{\text{PL}} $                  | $\lambda_{\text{EL}}$<br>(FWHM)<br>/ nm | $\text{EQE}_{\text{max}}$<br>/ % | $\text{EQE}_{100}$<br>/ % | Ref.   |
|-------------|-----------------------------------------|---------------------------|------------------------------------|-----------------------------------------|----------------------------------|---------------------------|--------|
| OBN-2CN-BN* | 498 (32) <sup>a</sup>                   | 95 <sup>a</sup>           | $9.1 \times 10^{-4}$ <sup>a</sup>  | 496 (33)                                | 29.8                             | 27.2                      | 33     |
| OBN-4CN-BN* | 510 (35) <sup>a</sup>                   | 90 <sup>a</sup>           | $1.04 \times 10^{-3}$ <sup>a</sup> | 508 (34)                                | 24.7                             | 23.5                      |        |
| R-BN        | 660 (38) <sup>b</sup>                   | 100 <sup>b</sup>          | $2 \times 10^{-3}$ <sup>c</sup>    | 664 (48)                                | 28.1                             | -                         | 34, 35 |
| R-TBN       | 692 (38) <sup>b</sup>                   | 100 <sup>b</sup>          | $2 \times 10^{-3}$ <sup>c</sup>    | 686 (49)                                | 27.6                             | -                         |        |
| QAO-PhCz    | 461 (29) <sup>b</sup>                   | 47 <sup>g</sup>           | $1.1 \times 10^{-3}$ <sup>b</sup>  | 467 (36)                                | 14                               | -                         | 36     |
| QPO-PhCz    | 446 (58) <sup>b</sup>                   | 51 <sup>h</sup>           | $1.6 \times 10^{-3}$ <sup>c</sup>  | 488 (-)                                 | 10.6                             | -                         | 37     |
| Hel-DiDiKTa | 478 (52) <sup>i</sup>                   | 4.1 <sup>i</sup>          | $4 \times 10^{-4}$ <sup>b</sup>    | -                                       | -                                | -                         | 38     |
| Helicene-BN | 525 (48) <sup>d</sup>                   | 98 <sup>d</sup>           | $2.1 \times 10^{-3}$ <sup>b</sup>  | 523 (49)                                | 31.5                             | 29.6                      | 39     |
| R-DOBN      | 453 (21) <sup>b</sup>                   | 91 <sup>e</sup>           | $1 \times 10^{-3}$ <sup>e</sup>    | 459 (38)                                | 23.9                             | 12.5                      | 40     |

|                         |                       |                   |                         |          |      |      |    |
|-------------------------|-----------------------|-------------------|-------------------------|----------|------|------|----|
| R-DOBNT                 | 459 (21) <sup>b</sup> | 96 <sup>e</sup>   | $0.9 \times 10^{-3e}$   | 464 (35) | 25.6 | 13.9 |    |
| BN-MeIAc                | 497 (30) <sup>b</sup> | 96 <sup>d</sup>   | $3.2 \times 10^{-4d}$   | 504 (33) | 37.2 | 36.1 | 41 |
| BN4                     | 500 (43) <sup>b</sup> | 88 <sup>b</sup>   | $(1-2) \times 10^{-3b}$ | 510 (49) | 20.6 | 20.5 | 42 |
| BN5                     | 497 (43) <sup>b</sup> | 87 <sup>b</sup>   | $(1-2) \times 10^{-3b}$ | 506 (48) | 26.5 | 17.6 |    |
| Spiro-BNCz              | 528 (42) <sup>b</sup> | 92 <sup>e</sup>   | $1.3 \times 10^{-3e}$   | 533 (48) | 34.2 | 22.5 | 43 |
| Czp-tBuCzB              | 478 (23) <sup>b</sup> | 98 <sup>e</sup>   | $1.6 \times 10^{-3e}$   | 479 (24) | 32.1 | 29.2 | 44 |
| Czp-POAB                | 497 (36) <sup>b</sup> | 96 <sup>e</sup>   | $1.4 \times 10^{-3e}$   | 513 (48) | 28.7 | 28.1 |    |
| BN-Py*                  | 527 (35) <sup>b</sup> | 90 <sup>b</sup>   | $3.67 \times 10^{-4a}$  | 532 (38) | 31.0 | 30.8 | 45 |
| 3-C <sub>2</sub>        | 543 (23) <sup>b</sup> | 72 <sup>b</sup>   | $1.5 \times 10^{-3b}$   | -        | -    | -    | 46 |
| 4-C <sub>1</sub>        | 520 (28) <sup>b</sup> | 85 <sup>b</sup>   | $1.1 \times 10^{-3b}$   | -        | -    | -    |    |
| RBNN                    | 617 (38) <sup>b</sup> | 96 <sup>b</sup>   | $1.41 \times 10^{-3b}$  | 617 (48) | 36.6 | 26.7 | 47 |
| DB-O                    | 443 (24) <sup>b</sup> | 91 <sup>f</sup>   | $1.4 \times 10^{-3b}$   | 445 (24) | 27.5 | 21.3 | 48 |
| DB-S                    | 444 (23) <sup>b</sup> | 95 <sup>f</sup>   | $1.5 \times 10^{-3b}$   | 447 (24) | 29.3 | 23.6 |    |
| B2NG                    | 588 <sup>b</sup>      | 50 <sup>b</sup>   | $2.5 \times 10^{-3b}$   | -        | -    | -    | 49 |
| BN[9]H                  | 578 (47) <sup>b</sup> | 98 <sup>b</sup>   | $5.8 \times 10^{-3b}$   | 580 (48) | 36.7 | 33.4 | 50 |
| PCP-DiKtA               | 469 (37) <sup>b</sup> | 93 <sup>j</sup>   | -                       | 489 (53) | 25.7 | 19.1 | 51 |
| Czp-DiKtA               | 505 (66) <sup>b</sup> | 99 <sup>j</sup>   | $4 \times 10^{-4b}$     | 518 (69) | 29.2 | 25.9 |    |
| BDBF-BNO                | 460 (27) <sup>b</sup> | 93 <sup>k</sup>   | $1.7 \times 10^{-3b}$   | 473 (38) | 32.1 | 20.8 | 52 |
| BDBT-BNO                | 460 (27) <sup>b</sup> | 96 <sup>k</sup>   | $1.8 \times 10^{-3b}$   | 470 (34) | 35.7 | 26.8 |    |
| BDBF-BOH                | 458 (27) <sup>b</sup> | 90 <sup>k</sup>   | $6.8 \times 10^{-4b}$   | 467 (30) | 29.5 | 15.8 | 53 |
| BDBT-BOH                | 459 (27) <sup>b</sup> | 91 <sup>k</sup>   | $8.5 \times 10^{-4b}$   | 467 (30) | 30.1 | 19.7 |    |
| DtCzB-OBN               | 491 (22) <sup>b</sup> | 97 <sup>e</sup>   | $6.5 \times 10^{-4e}$   | 493 (22) | 30.0 | -    | 54 |
| DtCzB-BN                | 494 (22) <sup>b</sup> | 98 <sup>e</sup>   | $1.8 \times 10^{-3e}$   | 494 (22) | 33.9 | -    |    |
| <i>p</i> -Spiro-DtBuCzB | 491 (25) <sup>b</sup> | 95 <sup>e</sup>   | $3.3 \times 10^{-4b}$   | 498      | 29.6 | -    | 55 |
| <i>m</i> -Spiro-DtBuCzB | 502 (33) <sup>b</sup> | 96.7 <sup>e</sup> | $6.6 \times 10^{-4b}$   | 508      | 33.8 | -    |    |
| NBOPO                   | 462 (25) <sup>b</sup> | 87 <sup>e</sup>   | $1.2 \times 10^{-3e}$   | 468 (31) | 16.4 | 2.51 | 56 |
| NBNPO                   | 498 (24) <sup>b</sup> | 93 <sup>e</sup>   | $4.3 \times 10^{-3e}$   | 502 (29) | 28.3 | 14.1 |    |
| <b>tBuPh-BN*</b>        | 490 (25) <sup>b</sup> | 85 <sup>b</sup>   | $1.5 \times 10^{-3b}$   | 492 (34) | 20.9 | 9.8  |    |

|               |                       |                 |                       |          |      |      |                  |
|---------------|-----------------------|-----------------|-----------------------|----------|------|------|------------------|
| DPA-tBuPh-BN* | 477 (28) <sup>b</sup> | 54 <sup>b</sup> | $0.9 \times 10^{-3b}$ | 480 (38) | 15.9 | 10.1 | <b>This work</b> |
|---------------|-----------------------|-----------------|-----------------------|----------|------|------|------------------|

<sup>a</sup> 3 wt% doped films in PhCzBCz; <sup>b</sup> In toluene; <sup>c</sup> In DCM; <sup>d</sup> 1 wt% doped films in DMIC-TRZ; <sup>e</sup> 5 wt% doped films in 2,6-DCzPPy; <sup>f</sup> 2 wt% doped films in DOBNA-OAr; <sup>g</sup> 5 wt% doped films in mCBP; <sup>h</sup> 18 wt% doped films in DPEPO; <sup>i</sup> 1 wt% doped films in mCP; <sup>j</sup> 2 wt% doped films in 2,6-DCzPPy; <sup>k</sup> 10 wt% doped films in 2,6-DCzPPy; \* HF devices.

## References:

1. M. Frisch, G. Trucks, H. Schlegel, G. Scuseria, M. Robb, J. Cheeseman, G. Scalmani, V. Barone, B. Mennucci and G. Petersson, *Gaussian 09 Revision D. 01*, 2009.
2. C. Adamo and V. Barone, Toward reliable density functional methods without adjustable parameters: The PBE0 model, *J. Chem. Phys.*, 1999, **110**, 6158-6170.
3. T. H. Dunning, Jr., Gaussian basis sets for use in correlated molecular calculations. I. The atoms boron through neon and hydrogen, *J. Chem. Phys.*, 1989, **90**, 1007-1023.
4. S. Grimme, Density functional calculations with configuration interaction for the excited states of molecules, *Chem. Phys. Lett.*, 1996, **259**, 128-137.
5. S. Hirata and M. Head-Gordon, Time-dependent density functional theory within the Tamm–Dancoff approximation, *Chem. Phys. Lett.*, 1999, **314**, 291-299.
6. H. Kubo, T. Hirose, T. Nakashima, T. Kawai, J.-y. Hasegawa and K. Matsuda, Tuning transition electric and magnetic dipole moments:[7] helicenes showing intense circularly polarized luminescence, *J. Phys. Chem. Lett.*, 2021, **12**, 686-695.
7. R. Dennington, T. Keith and J. Millam, *GaussView, Version 6*, Semichem Inc., Shawnee Mission KS, 2019.
8. C. Hättig, Geometry optimizations with the coupled-cluster model CC2 using the resolution-of-the-identity approximation, *J. Chem. Phys.*, 2003, **118**, 7751-7761.
9. A. Hellweg, S. A. Grün and C. Hättig, Benchmarking the performance of spin-component scaled CC2 in ground and electronically excited states, *Phys. Chem. Chem. Phys.*, 2008, **10**, 4119-4127.
10. K. Momma and F. Izumi, VESTA 3 for three-dimensional visualization of crystal, volumetric and morphology data, *J. Appl. Crystallogr.*, 2011, **44**, 1272-1276.

11. O. S. Lee and E. Zysman-Colman, *Silico (version 3.1)*, *In-Silico-Computing*, St Andrews, Scotland, 2023.
12. N. M. O'Boyle, A. L. Tenderholt and K. M. Langner, Cclib: a library for package - independent computational chemistry algorithms, *J. Comput. Chem.*, 2008, **29**, 839-845.
13. W. Humphrey, A. Dalke and K. Schulten, VMD: visual molecular dynamics, *J. Mol. Graph. Model.*, 1996, **14**, 33-38.
14. J. E. Stone, *An efficient library for parallel ray tracing and animation*, 1998.
15. J. D. Hunter, Matplotlib: A 2D graphics environment, *Comput. Sci. Eng.*, 2007, **9**, 90-95.
16. N. M. O'Boyle, M. Banck, C. A. James, C. Morley, T. Vandermeersch and G. R. Hutchison, Open Babel: An open chemical toolbox, *J. Cheminformatics*, 2011, **3**, 1-14.
17. N. M. O'Boyle, C. Morley and G. R. Hutchison, Pybel: a Python wrapper for the OpenBabel cheminformatics toolkit, *Chem. Cent. J.*, 2008, **2**, 1-7.
18. X. Gao, S. Bai, D. Fazzi, T. Niehaus, M. Barbatti and W. Thiel, Evaluation of spin-orbit couplings with linear-response time-dependent density functional methods, *J. Chem. Theory Comput.*, 2017, **13**, 515-524.
19. N. G. Connelly and W. E. Geiger, Chemical redox agents for organometallic chemistry, *Chem. Rev.*, 1996, **96**, 877-910.
20. J. Pommerehne, H. Vestweber, W. Guss, R. F. Mahrt, H. Bässler, M. Porsch and J. Daub, Efficient two layer leds on a polymer blend basis, *Adv. Mater.*, 1995, **7**, 551-554.
21. C. M. Cardona, W. Li, A. E. Kaifer, D. Stockdale and G. C. Bazan, Electrochemical Considerations for Determining Absolute Frontier Orbital Energy Levels of Conjugated Polymers for Solar Cell Applications, *Adv. Mater.*, 2011, **23**, 2367-2371.
22. G. A. Crosby and J. N. Demas, Measurement of photoluminescence quantum yields. Review, *J. Phys. Chem.*, 1971, **75**, 991-1024.
23. W. H. Melhuish, Quantum efficiencies of fluorescence of organic substances: effect of solvent and concentration of the fluorescent solute1, *J. Phys. Chem.*, 1961, **65**, 229-235.

24. N. Greenham, I. Samuel, G. Hayes, R. Phillips, Y. Kessener, S. Moratti, A. Holmes and R. Friend, Measurement of absolute photoluminescence quantum efficiencies in conjugated polymers, *Chem. Phys. Lett.*, 1995, **241**, 89-96.
25. F. Zinna, T. Bruhn, C. A. Guido, J. Ahrens, M. Bröring, L. Di Bari and G. Pescitelli, Circularly polarized luminescence from axially chiral BODIPY DYEmers: an experimental and computational study, *Chem. Eur. J.*, 2016, **22**, 16089-16098.
26. *CrystalClear-SM Expert v2.1.*, Rigaku Americas, The Woodlands, Texas, USA, and Rigaku Corporation, Tokyo, Japan, 2015.
27. *CrysAlisPro v1.171.41.93a and v1.171.43.109a*, Rigaku Oxford Diffraction, Rigaku Corporation, Tokyo, Japan, 2020-2023.
28. G. M. Sheldrick, SHELXT—Integrated space-group and crystal-structure determination, *Acta Crystallogr., Sect. A: Found. Adv.*, 2015, **71**, 3-8.
29. G. M. Sheldrick, Crystal structure refinement with SHELXL, *Acta Crystallogr., Sect. C: Struct. Chem.*, 2015, **71**, 3-8.
30. A. L. Spek, PLATON SQUEEZE: a tool for the calculation of the disordered solvent contribution to the calculated structure factors, *Acta Crystallogr., Sect. C: Struct. Chem.*, 2015, **71**, 9-18.
31. A. L. Spek, Structure validation in chemical crystallography, *Acta Crystallogr. Sect D: Biol. Crystallogr.*, 2009, **65**, 148-155.
32. O. V. Dolomanov, L. J. Bourhis, R. J. Gildea, J. A. Howard and H. Puschmann, OLEX2: a complete structure solution, refinement and analysis program, *J. Appl. Crystallogr.*, 2009, **42**, 339-341.
33. Y. Xu, Q. Wang, X. Cai, C. Li and Y. Wang, Highly Efficient Electroluminescence from Narrowband Green Circularly Polarized Multiple Resonance Thermally Activated Delayed Fluorescence Enantiomers, *Adv. Mater.*, 2021, **33**, 2100652.
34. Y. Zhang, D. Zhang, T. Huang, A. J. Gillett, Y. Liu, D. Hu, L. Cui, Z. Bin, G. Li, J. Wei and L. Duan, Multi-Resonance Deep-Red Emitters with Shallow Potential-Energy Surfaces to Surpass Energy-Gap Law, *Angew. Chem. Int. Ed.*, 2021, **60**, 20498-20503.
35. J. K. Li, X. Y. Chen, Y. L. Guo, X. C. Wang, A. C. Sue, X. Y. Cao and X. Y. Wang,

- B,N-Embedded Double Hetero[7]helicenes with Strong Chiroptical Responses in the Visible Light Region, *J. Am. Chem. Soc.*, 2021, **143**, 17958-17963.
36. S. Y. Yang, S. N. Zou, F. C. Kong, X. J. Liao, Y. K. Qu, Z. Q. Feng, Y. X. Zheng, Z. Q. Jiang and L. S. Liao, A narrowband blue circularly polarized thermally activated delayed fluorescence emitter with a hetero-helicene structure, *Chem. Commun.*, 2021, **57**, 11041-11044.
37. S.-Y. Yang, Q.-S. Tian, X.-J. Liao, Z.-G. Wu, W.-S. Shen, Y.-J. Yu, Z.-Q. Feng, Y.-X. Zheng, Z.-Q. Jiang and L.-S. Liao, Efficient circularly polarized thermally activated delayed fluorescence hetero-[4]helicene with carbonyl-/sulfone-bridged triarylamine structures, *J. Mater. Chem. C*, 2022, **10**, 4393-4401.
38. J. M. dos Santos, D. Sun, J. M. Moreno-Naranjo, D. Hall, F. Zinna, S. T. J. Ryan, W. Shi, T. Matulaitis, D. B. Cordes, A. M. Z. Slawin, D. Beljonne, S. L. Warriner, Y. Olivier, M. J. Fuchter and E. Zysman-Colman, An S-Shaped Double Helicene Showing both Multi-Resonance Thermally Activated Delayed Fluorescence and Circularly Polarized Luminescence, *J. Mater. Chem. C*, 2022, **10**, 4861-4870.
39. W. Yang, N. Li, J. Miao, L. Zhan, S. Gong, Z. Huang and C. Yang, Simple Double Hetero[5]helicenes Realize Highly Efficient and Narrowband Circularly Polarized Organic Light-Emitting Diodes, *CCS Chemistry*, 2022, **4**, 3463-3471.
40. Z. P. Yan, L. Yuan, Y. Zhang, M. X. Mao, X. J. Liao, H. X. Ni, Z. H. Wang, Z. An, Y. X. Zheng and J. L. Zuo, A Chiral Dual-Core Organoboron Structure Realizes Dual-Channel Enhanced Ultrapure Blue Emission and Highly Efficient Circularly Polarized Electroluminescence, *Adv. Mater.*, 2022, **34**, 2204253.
41. Y. Yang, N. Li, J. Miao, X. Cao, A. Ying, K. Pan, X. Lv, F. Ni, Z. Huang, S. Gong and C. Yang, Chiral Multi-Resonance TADF Emitters Exhibiting Narrowband Circularly Polarized Electroluminescence with an EQE of 37.2, *Angew. Chem. Int. Ed.*, 2022, **61**, e202202227.
42. X. Wu, J. W. Huang, B. K. Su, S. Wang, L. Yuan, W. Q. Zheng, H. Zhang, Y. X. Zheng, W. Zhu and P. T. Chou, Fabrication of Circularly Polarized MR-TADF Emitters with Asymmetrical Peripheral-Lock Enhancing Helical B/N-Doped Nanographenes, *Adv.*



- Mater.*, 2022, **34**, 2105080.
43. X. F. Luo, S. Q. Song, X. Wu, C. F. Yip, S. Cai and Y. X. Zheng, A chiral spirofluorene - embedded multiple - resonance thermally activated delayed fluorescence emitter for efficient pure - green circularly polarized electroluminescence, *Aggregate*, 2023, **5**, e445.
  44. X. J. Liao, D. Pu, L. Yuan, J. Tong, S. Xing, Z. L. Tu, J. L. Zuo, W. H. Zheng and Y. X. Zheng, Planar Chiral Multiple Resonance Thermally Activated Delayed Fluorescence Materials for Efficient Circularly Polarized Electroluminescence, *Angew. Chem. Int. Ed.*, 2023, **62**, e202217045.
  45. Q. Wang, L. Yuan, C. Qu, T. Huang, X. Song, Y. Xu, Y. X. Zheng and Y. Wang, Constructing Highly Efficient Circularly Polarized Multiple-Resonance Thermally Activated Delayed Fluorescence Materials with Intrinsically Helical Chirality, *Adv. Mater.*, 2023, **35**, 2305125.
  46. F. Zhang, F. Rauch, A. Swain, T. B. Marder and P. Ravat, Efficient Narrowband Circularly Polarized Light Emitters Based on 1,4-B,N-embedded Rigid Donor-Acceptor Helicenes, *Angew. Chem. Int. Ed.*, 2023, **62**, e202218965.
  47. G. Meng, J. Zhou, X. S. Han, W. Zhao, Y. Zhang, M. Li, C. F. Chen, D. Zhang and L. Duan, B-N Covalent Bond Embedded Double Hetero-[n]helicenes for Pure Red Narrowband Circularly Polarized Electroluminescence with High Efficiency and Stability, *Adv. Mater.*, 2024, **36**, 2307420.
  48. Z. Ye, H. Wu, Y. Xu, T. Hua, G. Chen, Z. Chen, X. Yin, M. Huang, K. Xu, X. Song, Z. Huang, X. Lv, J. Miao, X. Cao and C. Yang, Deep-Blue Narrowband Hetero[6]helicenes Showing Circularly Polarized Thermally Activated Delayed Fluorescence Toward High-Performance OLEDs, *Adv. Mater.*, 2024, **36**, 2308314.
  49. G. Venugopal, V. Kumar, A. Badrinarayan Jadhav, S. D. Dongre, A. Khan, R. Gonnade, J. Kumar and S. Santhosh Babu, Boron- and Oxygen-Doped pi-Extended Helical Nanographene with Circularly Polarised Thermally Activated Delayed Fluorescence, *Chem. Eur. J.*, 2024, **30**, e202304169.
  50. W. C. Guo, W. L. Zhao, K. K. Tan, M. Li and C. F. Chen, B,N-Embedded

- Hetero[9]helicene Toward Highly Efficient Circularly Polarized Electroluminescence, *Angew. Chem. Int. Ed.*, 2024, **63**, e202401835.
51. Y. Xu, H. Hafeez, J. Seibert, S. Wu, J. S. O. Ortiz, J. Crassous, S. Bräse, I. D. W. Samuel and E. Zysman - Colman, [2.2]Paracyclophane - Substituted Chiral Multiresonant Thermally Activated Delayed Fluorescence Emitters for Efficient Organic Light - Emitting Diodes, *Adv. Funct. Mater.*, 2024, DOI: 10.1002/adfm.202402036, 2402036.
52. L. Yuan, Y. F. Yang, Z. P. Yan, J. J. Hu, D. Mao, H. X. Ni and Y. X. Zheng, Circularly Polarized Electroluminescence from Intrinsically Axial Chiral Materials Based on Bidibenzo[b,d]furan/bidibenzo[b,d]thiophene, *Adv. Funct. Mater.*, 2024, 2403803.
53. L. Yuan, J. W. Xu, Z. P. Yan, Y. F. Yang, D. Mao, J. J. Hu, H. X. Ni, C. H. Li, J. L. Zuo and Y. X. Zheng, Tetraborated Intrinsically Axial Chiral Multi-resonance Thermally Activated Delayed Fluorescence Materials, *Angew. Chem. Int. Ed.*, 2024, **63**, e202407277.
54. S. Xing, X. S. Zhong, X. J. Liao, Y. Wang, L. Yuan, H. X. Ni and Y. X. Zheng, Axially Chiral Multiple Resonance Thermally Activated Delayed Fluorescence Enantiomers for Efficient Circularly Polarized Electroluminescence, *Adv. Optical Mater.*, 2024, **12**, 2400685.
55. S.-Q. Song, X. Han, Z.-Z. Huo, C.-F. Yip, X.-F. Hong, M.-N. Ding and Y.-X. Zheng, Chiral multiple-resonance thermally activated delayed fluorescence materials based on chiral spiro-axis skeleton for efficient circularly polarized electroluminescence, *Sci. China Chem.*, 2024, **67**, 2257-2264.
56. Y. Wang, Z. Y. Lv, Z. X. Chen, S. Xing, Z. Z. Huo, X. F. Hong, L. Yuan, W. Li and Y. X. Zheng, Multiple-resonance thermally activated delayed fluorescence materials based on phosphorus central chirality for efficient circularly polarized electroluminescence, *Mater. Horiz.*, 2024, DOI: 10.1039/d4mh00605d.
